# Supplementary material for: Validation of Plasmodium falciparum deoxyhypusine synthase as an antimalarial target
Source: PeerJ. 2019 Apr 17;7:e6713. doi: 10.7717/peerj.6713 (PMC6475138; doi:10.7717/peerj.6713)
Supplement: Supplemental Information 14 [file peerj-07-6713-s014.xlsx]

## Sheet: Sheet1
Oligonucleotide primer name	Sequence 5'-3'
pGFP_glmS_DHSF	AAATGTTATCAGACCTAGCGATCACGTTTCTTTTAAAGAG
GFP_glmS_DHSR	TTGTTGCTCTTGAGGTACCTGACATATCTTTTTTCCTCT
DHS_intF	CAATCGTATGTAAGATATGGTGG
PfFCSacIIF	TCCCCGCGGGTATATGGATAAAAGATGGATC
PfFCKpnIR	GGGGTACCTGACACCCATCCTATTATATTTTG
BglII_PfFC F	GAAGATCTATGGACGTACAGGATTTTCTGAATTG
3UTRpbDT-glmSR	CATTTTTACAGTTATAAATACAATCAATTGG
LDH-F	GCACCAAAAGCAAAAATCGT
LDH-R	ACATCTGCTCCAGCCAAATC
DHFRTS-F	ACCCTATCCATTCCCAACAC
DHFRTS-R	TGGGACAACTCCAGTGAAAA
DHS-F	TTTGGTGATGCAACCATTTT
DHS-R	TTGTGCCCATTAACATCACC
FC-F	AATATAATAGGATGGGTGTCAGG
FC-R	TTGTGCCCATTAACATCACC
