# Supplementary material for: Validation of Plasmodium falciparum deoxyhypusine synthase as an antimalarial target
Source: PeerJ. 2019 Apr 17;7:e6713. doi: 10.7717/peerj.6713 (PMC6475138; doi:10.7717/peerj.6713)
Supplement: Supplemental Information 15 — Annotated P. falciparum 3D7 proteins in PlasmoDB 38 (Aurrecoechea et al., 2009) were searched for PPP and PPG motifs using the Protein Motif Pattern tool in PlasmoDB. Data of piggyBac transposon insertions in the protein coding region of corresponding genes were reported in (Zhang et al., 2018). Data of orthologous genes targeted for knockout in P. berghei and the associated growth phenotypes were reported in (Bushell et al., 2017). [file peerj-07-6713-s015.xlsx]

## Sheet: Column header descriptions
Ortholog Group	Orthologous gene group ID to which P. falciparum and/or P. berghei gene belong to
P. falciparum Gene ID	P. falciparum PlasmoDB release 40 gene ID
Product Description	Annotated gene function
Match Locations	Locations of PPP and/or PPG motifs in protein sequence
Match Count	Count of matches to PPP and PPG
Motif	Protein sequence context of match to PPP and/or PPG
P.falciparum piggyBac insertion mutagenesis - mutagenesis index score	mutagenesis index score from piggyBac saturation mutagenesis (Zhang et al., 2018)
P.falciparum piggyBac insertion mutagenesis - mutant fitness score	mutagenesis fitness score from piggyBac saturation mutagenesis (Zhang et al., 2018)
Gene Identification	Status of transposon insertions in coding region of gene from piggyBac saturation mutagenesis (Zhang et al., 2018)
P. berghei ortholog	Orthologous gene in P. berghei matched to Ortholog group
Product Description	Annotated gene function
Match Locations	Locations of PPP and/or PPG motifs in protein sequence
Match Count	Count of matches to PPP and PPG
Motif	Protein sequence context of match to PPP and/or PPG
Phenotype	Growth phenotype of knockout mutant (Bushell et al., 2017)
Category	Category with respect to polyproline (polyP) matches: 1. PolyP present in both P. falciparum and P. berghei orthologs. 2. PolyP present in P. falciparum, but not in P. berghei ortholog. 3. Poly P genes in P. falciparum with no P. berghei ortholog. 4. PolyP present in P. berghei, but not in P. falciparum ortholog. 5. PolyP genes in P. berghei with no P. falciparum ortholog.

## Sheet: PfPbPolyP_both
Ortholog Group	P. falciparum Gene ID	Product Description	Match Locations	Match Count	Motif	P.falciparum piggyBac insertion mutagenesis - mutagenesis index score	P.falciparum piggyBac insertion mutagenesis - mutant fitness score	Gene Identification		P. berghei ortholog	Product Description	Match Locations	Match Count	Motif	Phenotype	Category
OG5_127068	PF3D7_0407900	AAA family ATPase, putative	(432-434)	1	... LRPDLFTGLNRAAKGILLFG<span class=\motif\">PPG</span>TGKTMVAKWVASSCKCSFYN..."	1	-1.68	Mutable in CDS		PBANKA_1005500	AAA family ATPase, putative	(389-391)	1	... LRPDLFTGLNRAAKGILLFG<span class=\motif\">PPG</span>TGKTMIAKWVASYCRCSFYN..."	Dispensable	1
OG5_129816	PF3D7_0607600	spindle assembly abnormal protein 6, putative	(858-860)	1	... NGKIDTLDINDRYNKPVKFI<span class=\motif\">PPG</span>I"	1	-1.782	Mutable in CDS		PBANKA_0106200	spindle assembly abnormal protein 6	(749-751)	1	... SGKIDALDINDRYNKPVKFI<span class=\motif\">PPG</span>I"	Dispensable	1
OG5_145108	PF3D7_0722800	conserved Plasmodium protein, unknown function	(275-277)	1	... VKGFIQSVASSVVDIVPPLI<span class=\motif\">PPP</span>IWINRPLPCLPMITGKNCLG..."	0.998	-2.575	Mutable in CDS		PBANKA_0620300	conserved Plasmodium protein, unknown function	(243-245)	1	... VKGLIQSVASSVVDIVPPLI<span class=\motif\">PPP</span>IWVNRPLPCLPMVTGKNCLG..."	Dispensable	1
OG5_150532	PF3D7_0723900	RNA-binding protein, putative	(356-358), (359-361), (513-515)	3	... NNDQQDIPDHFHHSNHFSHI<span class=\motif\">PPP</span><span class=\"motif\">PPP</span>TSLYNNNNDNNNDNDNNNNN... SHNNNNNNNNYSKGLYSKHI<span class=\"motif\">PPP</span>PFNEHNNFTTLSMSNINMKN..."	1	-1.763	Mutable in CDS		PBANKA_0621400	RNA-binding protein, putative	(326-328), (329-331)	2	... YNSSINSEHANKINNKGDVY<span class=\motif\">PPP</span><span class=\"motif\">PPP</span>PFFSYTDNSVNNIQNINSSN..."	Dispensable	1
OG5_156229	PF3D7_0807600	conserved Plasmodium protein, unknown function	(1305-1307)	1	... SRNFDMNNFTISSERKSWKL<span class=\motif\">PPP</span>PPNIPPSYDRSSQRRTSNFY..."	1	-0.592	Mutable in CDS		PBANKA_1223000	conserved Plasmodium protein, unknown function	(1112-1114)	1	... NKYYDISNNGKHSEKKNWKF<span class=\motif\">PPP</span>PPNIPPLYDSQSKKRNNSFY..."	Dispensable	1
OG5_126794	PF3D7_0817500	protein kinase c inhibitor-like protein, putative	(183-185)	1	... ACQSIYYLHLHILAKRQMKW<span class=\motif\">PPG</span>"	0.991	-0.731	Mutable in CDS		PBANKA_0713300	protein kinase c inhibitor-like protein, putative	(184-186)	1	... ACQSVYYLHLHILAKRQMKW<span class=\motif\">PPG</span>"	Dispensable	1
OG5_131493	PF3D7_1004300	E3 ubiquitin-protein ligase, putative	(334-336)	1	... NISLDQVLTIIMESDPSRNG<span class=\motif\">PPP</span>ASEEVIKNLKVETLTEERAK..."	0.986	-2.039	Non - Mutable in CDS		PBANKA_1202600	E3 ubiquitin-protein ligase, putative	(311-313)	1	... NISLDQVLTIIMESDPSRNG<span class=\motif\">PPP</span>ASEEIIKNLKVEKLTFERAQ..."	Dispensable	1
OG5_128540	PF3D7_1005500	regulator of nonsense transcripts 1, putative	(834-836)	1	... HSQIDAIKRSLLSPLSLIQG<span class=\motif\">PPG</span>TGKTLTCATLVYHLVKMNMG..."	1	0.093	Mutable in CDS		PBANKA_1203700	regulator of nonsense transcripts 1, putative	(666-668)	1	... HSQIDAIQKSLNSPLSLIQG<span class=\motif\">PPG</span>TGKTLTCATLVYHMHKTKMG..."	Dispensable	1
OG5_150523	PF3D7_1006000	IMP1-like protein, putative	(250-252), (361-363)	2	... LNFIGAAAAPNPPKEASCIG<span class=\motif\">PPP</span>QVKETNINVKEGIYLIYNAE... MKMKKTYNGVLYFLPAFNEQ<span class=\"motif\">PPP</span>NLDIGFFDTKEKKLNYVEIE..."	1	1.453	Mutable in CDS		PBANKA_1204200	IMP1-like protein, putative	(264-266), (375-377)	2	... LNFLGAAAAPTPPEEKYCIG<span class=\motif\">PPP</span>EVRKTTINVNKGIYLIYNNE... IKLKKKFNGTLYFLPAFESQ<span class=\"motif\">PPP</span>QLDIIFFNTREKKLSYAPIE..."	Dispensable	1
OG5_129325	PF3D7_1009400	zinc finger protein, putative	(265-267), (270-272)	2	... YSANINLLPTNINQHNPMYM<span class=\motif\">PPG</span>LY<span class=\"motif\">PPP</span>IPPLNHPSIPPTHIPSSTYP..."	0.724	-2.005	Mutable in CDS		PBANKA_1207700	zinc finger protein, putative	(257-259)	1	... KLPHNTFPSMDSTFMPQNIC<span class=\motif\">PPP</span>VPPSAPPSGPPLLPPSAPVI..."	Dispensable	1
OG5_163008	PF3D7_1022700	phospholipid scramblase, putative	(32-34)	1	MEEKNIHMQPNINYSYRNPNMYNMNYHNPIV<span class=\motif\">PPP</span>QQQMQLFVNDWKSILSPMQT..."	1	-1.841	Mutable in CDS		PBANKA_0506900	phospholipid scramblase, putative	(188-190)	1	... MNNPNMNYPNMNFQQYPYII<span class=\motif\">PPP</span>QQQMAMFFNDWRTVLAPLKG..."	Dispensable	1
OG5_160923	PF3D7_1106700	DNA replication ATP-dependent helicase/nuclease DNA2, putative	(379-381)	1	... NQKKAVYSCIFSNDIFCIHG<span class=\motif\">PPG</span>TGKTTVLCELIYQLIQRNYK..."	1	-1.732	Mutable in CDS		PBANKA_0940200	DNA replication ATP-dependent helicase/nuclease DNA2, putative	(291-293)	1	... SQKKAVYHCLYSDNIFCVHG<span class=\motif\">PPG</span>TGKTTVLCEIIFQLIKNKNC..."	Dispensable	1
OG5_128995	PF3D7_1139500	AAA family ATPase, putative, unspecified product	(368-370)	1	... STKKVDCNMINYNHLVLLYG<span class=\motif\">PPG</span>TGKTSLCKALANKVCIRLSN..."	1	-1.669	Mutable in CDS		PBANKA_0909500	AAA family ATPase, putative	(305-307)	1	... ASKKIDCNLINYNHLVLLYG<span class=\motif\">PPG</span>TGKTSLCKALANKICIRLSN..."	Dispensable	1
OG5_145114	PF3D7_1207700	blood stage antigen 41-3 precursor	(159-161)	1	... DEEKTSDNVSQMYERKGGPL<span class=\motif\">PPP</span>ELRKHTLFLEQNYLNKTIPS..."	0.141	-2.858	Non - Mutable in CDS		PBANKA_0606200	blood stage antigen 41-3 precursor, putative	(156-158)	1	... SEENNLKKLQKKNSEKSGPL<span class=\motif\">PPP</span>ELRNHTSFLQQNYINKTIPS..."	Dispensable	1
OG5_127600	PF3D7_1241700	replication factor C subunit 4, putative	(111-113)	1	... RGINVIRDRIKSFAKEIISL<span class=\motif\">PPG</span>KHKIIILDEVDSMTTAAQQS..."	0.119	-3.256	Non - Mutable in CDS		PBANKA_1455100	replication factor C subunit 4, putative	(111-113)	1	... RGINVIRDRIKSFAKEVISL<span class=\motif\">PPG</span>RHKIIILDEVDSMTTAAQQS..."	Dispensable	1
OG5_150598	PF3D7_1311700	cytochrome c, putative	(23-25)	1	MNIGGYKKKGNLDDEFPDDFVL<span class=\motif\">PPG</span>DKVKGEKLFKKHCKQCHSIA..."	0.31	-2.645	Non - Mutable in CDS		PBANKA_1410200	cytochrome c, putative	(22-24)	1	MNLFKNKKDIYNDDFQANFVL<span class=\motif\">PPG</span>DKVKGEKLFKKHCKQCHSIA..."	Dispensable	1
OG5_130345	PF3D7_1338400	SprT-like domain-containing protein, putative	(304-306)	1	... TGVCRKYPPHFGFVKRSMNR<span class=\motif\">PPG</span>PKEKWWRRHSSYCCGNFVKI..."	1	-1.556	Mutable in CDS		PBANKA_1352100	SprT-like domain-containing protein, putative	(302-304)	1	... TGICRKYPPHFGYIKRSMNR<span class=\motif\">PPG</span>PKEKWWRSHSTYCSGKFVKI..."	Dispensable	1
OG5_126955	PF3D7_1367500	NADH-cytochrome b5 reductase, putative	(339-341)	1	... KYEKLNIEVKNKDTLILLCG<span class=\motif\">PPP</span>MTSSIKSILKDQIHMENIIV..."	0.187	-3.347	Non - Mutable in CDS		PBANKA_1143400	NADH-cytochrome b5 reductase, putative	(333-335)	1	... KYEKLSMPIQNSDTLILTCG<span class=\motif\">PPP</span>MTSLLNVLLKEEMKMENVII..."	Dispensable	1
OG5_127506	PF3D7_0214100	protein transport protein SEC31	(1047-1049), (1065-1067), (1201-1203), (1310-1312)	4	... TSTSNIINNNTMNSNFKSVI<span class=\motif\">PPP</span>LPMNTQMNNSTSSIQ<span class=\"motif\">PPP</span>SVPPTKFHTQIINNTMNSRS... MFSSNSYGNINKTHTTNNAV<span class=\"motif\">PPP</span>PNVTSSVVTPPMPSNQLNNT... PGGFQDNTSQMNYGMQPTGS<span class=\"motif\">PPP</span>SSLSTTSPIAGALTVTPGMP..."	0.209	-2.744	Non - Mutable in CDS		PBANKA_0311000	protein transport protein SEC31, putative	(927-929), (1059-1061), (1147-1149)	3	... LTLRDRIFNSAAHIMPPHIK<span class=\motif\">PPP</span>SPFQYFDIKPFGLSQKYNNS... TSNFNNNVKYPSNGMGSLYI<span class=\"motif\">PPP</span>NIPSHSTTPINASSPPHTSV... PSNKIPNISRSSFSVSQNNI<span class=\"motif\">PPP</span>FSQRNRHTSVSTSMGNPIQQ..."	Essential	1
OG5_127665	PF3D7_0303000	N-ethylmaleimide-sensitive fusion protein	(295-297)	1	... PNYIIKQLSIKHVKGMILYG<span class=\motif\">PPG</span>TGKTLIARQIGKTLNAREPK..."	0.186	-3.241	Non - Mutable in CDS		PBANKA_0401600	N-ethylmaleimide-sensitive fusion protein, putative	(287-289)	1	... PNYIIKQLGIKHVKGMILYG<span class=\motif\">PPG</span>TGKTLIARQIGKTLNARDPK..."	Essential	1
OG5_167026	PF3D7_0311200	valine--tRNA ligase, putative	(266-268)	1	... IEYIRKFNRSHYLNSYLLIY<span class=\motif\">PPP</span>NLSGNLHAGHFFNFIHQHIF..."	0.12	-2.924	Non - Mutable in CDS		PBANKA_0409200	valine--tRNA ligase, putative	(248-250)	1	... KKYQEKFNTFHYANSFILVY<span class=\motif\">PPP</span>NLSGQLHAGHYHNFIYQDII..."	Essential	1
OG5_126637	PF3D7_0318200	DNA-directed RNA polymerase II subunit RPB1	(276-278)	1	... LGFNSDRCVPASLILTCIPI<span class=\motif\">PPP</span>CARPYVQYGNQRSEDDLTLK..."	0.144	-2.838	Non - Mutable in CDS		PBANKA_0807000	DNA-directed RNA polymerase II subunit RPB1, putative	(279-281)	1	... LGFNSDRCIPPSLILTFMPI<span class=\motif\">PPP</span>CARPYVQYGNQRSEDDLTLK..."	Essential	1
OG5_127578	PF3D7_0405400	pre-mRNA-processing-splicing factor 8, putative	(215-217), (229-231)	2	... PHMHNLPPNMHSLPPNMNYI<span class=\motif\">PPG</span>INNYMPNMMNM<span class=\"motif\">PPP</span>YMMKMPNMKMKSNKIINNVS..."	0.17	-2.781	Non - Mutable in CDS		PBANKA_1003100	pre-mRNA-processing-splicing factor 8, putative	(86-88), (93-95), (142-144)	3	... SVHHNVPINAPNLPPTFPNI<span class=\motif\">PPP</span>IPGL<span class=\"motif\">PPP</span>NTHVMVPPNIPGMPPNMHNM... MNYMMPPNMNHFLPPNMMNF<span class=\"motif\">PPP</span>FMMKNNQMKNANYMNNQNMY..."	Essential	1
OG5_128306	PF3D7_0409100	U4/U6 small nuclear ribonucleoprotein PRP31, putative	(394-396)	1	... GQYGLLLRQYIISHLIKLQE<span class=\motif\">PPP</span>LKQKKILPMPDEKRKRKRGG..."	0.125	-3.04	Non - Mutable in CDS		PBANKA_1006700	U4/U6 small nuclear ribonucleoprotein PRP31, putative	(376-378)	1	... GQYGLLLREYVINHLIKLQE<span class=\motif\">PPP</span>MKQKKILPIPDEKKGRKRGG..."	Essential	1
OG5_126952	PF3D7_0409400	chaperone protein DnaJ	(277-279), (550-552)	2	... CKHCSGSGVKFQTKNITLDI<span class=\motif\">PPG</span>IKKGMQMRIPNQGHCGYRGG... PHTHKIVNNLESKNSCNIPI<span class=\"motif\">PPP</span>PPKSSSKPISENQNISNREH..."	1	-0.609	Mutable in CDS		PBANKA_1007000	chaperone protein DnaJ, putative	(287-289)	1	... CKHCSGSGVKFQTKNITLDI<span class=\motif\">PPG</span>IKKGMQMRIPNQGHSGYRGG..."	Essential	1
OG5_156239	PF3D7_0420300	AP2 domain transcription factor, putative	(312-314)	1	... NNNCDHVKPLCCSYILRFEG<span class=\motif\">PPP</span>HFLIIKFDKVNRKAYIVKRV..."	0.401	-2.563	Non - Mutable in CDS		PBANKA_0521700	AP2 domain transcription factor, putative	(327-329)	1	... NNIESYNDIEHYSYALQFEG<span class=\motif\">PPP</span>HFLILKRNNITNHSTVVKKI..."	Essential	1
OG5_146129	PF3D7_0503900	conserved Plasmodium protein, unknown function	(633-635)	1	... SNNLWMKNSSLIYRYDYKKY<span class=\motif\">PPP</span>GQNFIDIFSYNIIGKCISFF..."	0.66	-3.021	Mutable in CDS		PBANKA_1103500	conserved Plasmodium protein, unknown function	(555-557)	1	... SNNLWLKNSSLIYRYDYKKY<span class=\motif\">PPP</span>GQDFIDIISYSFIGKCISFF..."	Essential	1
OG5_128627	PF3D7_0518500	ATP-dependent RNA helicase DDX23, putative	(694-696)	1	... DRDWRIFREDNEIYIKGGVV<span class=\motif\">PPP</span>IRKWEESNLSNDLLKAIKKA..."	0.515	-2.462	Non - Mutable in CDS		PBANKA_1233300	ATP-dependent RNA helicase DDX23, putative	(510-512)	1	... DRDWRIFREDNEIYIKGGVV<span class=\motif\">PPP</span>IRKWEESNLSSDLLKAIKKA..."	Essential	1
OG5_127739	PF3D7_0527100	ubiquitin-conjugating enzyme E2 N, putative	(18-20)	1	MSIPRRITKETQNLANE<span class=\motif\">PPP</span>GIMAVPVPENYRHFNILING..."	0.146	-3.121	Non - Mutable in CDS		PBANKA_1241900	ubiquitin-conjugating enzyme E2 N, putative	(18-20)	1	MSIPRRIIKETQNLANE<span class=\motif\">PPP</span>GIVAAPVPENYRHFDILING..."	Essential	1
OG5_128574	PF3D7_0603200	mitochondrial chaperone BCS1, putative	(259-261)	1	... SSKWYIDKGIPYRRCYLLHG<span class=\motif\">PPG</span>CGKSSLITALAGYFDFNICT..."	0.226	-2.638	Non - Mutable in CDS		PBANKA_0102000	mitochondrial chaperone BCS1, putative	(259-261)	1	... SSKWYIDKGIPYRRCYLLHG<span class=\motif\">PPG</span>CGKSSLISALAGYFDFNICT..."	Essential	1
OG5_166983	PF3D7_0612000	conserved Plasmodium protein, unknown function	(10-12)	1	MSEIGFISH<span class=\motif\">PPP</span>EPDFWIYFAKYLRNTWVQWA..."	0.196	-2.485	Non - Mutable in CDS		PBANKA_0110300	conserved Plasmodium protein, unknown function	(7-9)	1	MEYLSH<span class=\motif\">PPP</span>KPDFWIYFASYLRNGWIQWT..."	Essential	1
OG5_126926	PF3D7_0619400	cell division cycle protein 48 homologue, putative	(249-251), (522-524)	2	... HPGLFKTLGVKPPRGVLLYG<span class=\motif\">PPG</span>SGKTCIARAVANETGAFFFL... HPDKFEKFGMSPSRGVLFYG<span class=\"motif\">PPG</span>CGKTLLAKAVASECSANFVS..."	0.425	-2.6	Non - Mutable in CDS		PBANKA_1118600	cell division cycle protein 48 homologue, putative	(247-249), (520-522)	2	... HPGLFKTLGVKPPRGVLLYG<span class=\motif\">PPG</span>SGKTCIARAVANETGAFFFL... HPDKFEKFGMAPSRGVLFYG<span class=\"motif\">PPG</span>CGKTLLAKAVASECSANFVS..."	Essential	1
OG5_128401	PF3D7_0623600	transcription or splicing factor-like protein, putative	(65-67), (106-108), (355-357), (358-360), (361-363), (596-598)	6	... SNKWGSEDYKPYLPLPFVDF<span class=\motif\">PPG</span>LTPAQLDQFLREQRYDELTKKLNKGELEYVDPDIRPPS<span class=\"motif\">PPP</span>IYDKNGSRINTREARIKNSM... DLENSNNLSQPIHTHVHSPA<span class=\"motif\">PPP</span><span class=\"motif\">PPP</span><span class=\"motif\">PPP</span>LYDPLISTPQGFNGMYKMDT... QIPMNYAEQLLVNAPAPDTN<span class=\"motif\">PPP</span>LPSDSVCLNKEENTNTT"	0.985	-2.573	Mutable in CDS		PBANKA_1122500	conserved Plasmodium protein, unknown function	(63-65), (104-106), (340-342), (593-595)	4	... PSRWGDENYKPYLPLPFVDY<span class=\motif\">PPG</span>LTPSQLDQFLREQRYDELTKKLNKGELEYVDPDIRPPS<span class=\"motif\">PPP</span>IYDKNGNRINTREARIKNSM... KLAKQNNFMKNNFDSSNIPA<span class=\"motif\">PPP</span>DDGMTPTAFDRKNNHPYINK... QFPMNYSEDLLAHAAAPDTN<span class=\"motif\">PPP</span>LPSENGNAQEEKNDM"	Essential	1
OG5_147423	PF3D7_0708700	Cg8 protein	(43-45)	1	... GKNIFRRYVASQPLGINIPD<span class=\motif\">PPP</span>REYLPNGEPKTYRLNQRYYN..."	0.994	-2.415	Non - Mutable in CDS		PBANKA_1219200	Cg8 protein, putative	(39-41)	1	MQLYSNGKKQIFIRMNNNVRNVFKRYVASQPLGINIPE<span class=\motif\">PPP</span>REFLPNGEPKKYRLNQRYYD..."	Essential	1
OG5_128467	PF3D7_0711000	AAA family ATPase, CDC48 subfamily	(976-978)	1	... YKHLYNKFNSNYNKGILLYG<span class=\motif\">PPG</span>CGKTLLAKAIANECKANFIS..."	0.125	-2.992	Non - Mutable in CDS		PBANKA_1221600	cell division cycle ATPase, putative	(868-870)	1	... YKHLYNKFNSNYNKGILLYG<span class=\motif\">PPG</span>CGKTLLAKAIANECNANFIS..."	Essential	1
OG5_127131	PF3D7_0802800	serine/threonine protein phosphatase 2B catalytic subunit A	(18-20)	1	MEPLPDPKNDRQVKDVE<span class=\motif\">PPP</span>AKPLSLELLYPNGTEEPPDY..."	0.178	-2.768	Non - Mutable in CDS		PBANKA_1227400	serine/threonine protein phosphatase 2B catalytic subunit A	(18-20)	1	MEPLPDPKNDRQIKDVE<span class=\motif\">PPP</span>SKPLATQLLYPNGTEEPPDY..."	Essential	1
OG5_165422	PF3D7_0813400	conserved Plasmodium protein, unknown function	(468-470), (557-559)	2	... NNLMQNNMNFALNKKGNMNL<span class=\motif\">PPP</span>PPNNLGMQPNNVTMANQNMN... MNGAYNNNFRNNMYQQNIPL<span class=\"motif\">PPP</span>INNFNKKIYQGHNINMKTNN..."	0.205	-2.542	Non - Mutable in CDS		PBANKA_1424200	conserved Plasmodium protein, unknown function	(471-473)	1	... NNMMQNNMVYGLNKKGNVNL<span class=\motif\">PPP</span>PPTNLNMQANNVNMPNQNMN..."	Essential	1
OG5_127203	PF3D7_0822600	protein transport protein SEC23	(123-125)	1	... PADVMYSNIEYIQPSNVGDI<span class=\motif\">PPP</span>TFLFVIDTCLLEEELEQLKD..."	0.172	-2.889	Non - Mutable in CDS		PBANKA_0708000	protein transport protein SEC23, putative	(123-125)	1	... PADVMYSNIEYIQPSNVGDI<span class=\motif\">PPP</span>TFLFVIDTCLLEEELEQLKD..."	Essential	1
OG5_127551	PF3D7_0826100	HECT-like E3 ubiquitin ligase, putative	(7838-7840)	1	... IITNVENENNDEKKKENDDE<span class=\motif\">PPP</span>TILNYLLPLMEAYLFIEEVI..."	0.125	-2.928	Non - Mutable in CDS		PBANKA_0704500	HECT-like E3 ubiquitin ligase, putative	(6945-6947)	1	... NENDQNIEQDDEKKKENSDE<span class=\motif\">PPP</span>TILNYLLPLMEAYLFIEEVI..."	Essential	1
OG5_126620	PF3D7_0910800	cytosolic Fe-S cluster assembly factor NBP35, putative	(234-236)	1	... IKQFLCDVYWKNLDFLIIDT<span class=\motif\">PPG</span>TSDEHLTICSYLKDNLDGCL..."	0.422	-2.49	Non - Mutable in CDS		PBANKA_0811900	cytosolic Fe-S cluster assembly factor NBP35, putative	(235-237)	1	... IKQFLCDVYWKNLDFLIIDT<span class=\motif\">PPG</span>TSDEHLTICSYLKDNLDGCL..."	Essential	1
OG5_126599	PF3D7_0917600	pre-mRNA-splicing factor ATP-dependent RNA helicase PRP43, putative	(428-430)	1	... LVVLPLYSSLPPAQQQKIFE<span class=\motif\">PPP</span>KPRFKGDKNGRKCILATNIA..."	0.148	-2.845	Non - Mutable in CDS		PBANKA_0818600	pre-mRNA-splicing factor ATP-dependent RNA helicase PRP43, putative	(393-395)	1	... CLPLYSSLPPAQQQKIFEPA<span class=\motif\">PPP</span>RYKGDKKGRKCILATNIAET..."	Essential	1
OG5_128188	PF3D7_0917700	GPN-loop GTPase, putative	(10-12)	1	MWYGQLVIG<span class=\motif\">PPG</span>SGKSTYVAGVTHILKQINRK..."	0.186	-3.362	Non - Mutable in CDS		PBANKA_0818700	GPN-loop GTPase, putative	(10-12), (331-333)	2	MWFGQIVIG<span class=\motif\">PPG</span>SGKSTYVAGIQHILKQINRK... DCDEIQEKFIDVSDDDFQTQ<span class=\"motif\">PPP</span>NTNNI"	Essential	1
OG5_127015	PF3D7_0934500	V-type proton ATPase subunit E, putative	(181-183)	1	... KQFNVTKTVKIELDKSGNYL<span class=\motif\">PPP</span>PTPENEGNSCLGGVILTTPN..."	0.141	-2.871	Non - Mutable in CDS		PBANKA_0835300	V-type proton ATPase subunit E, putative	(181-183)	1	... KQFNITKNVKIELDKSGNYL<span class=\motif\">PPP</span>PSENNEGASCLGGIILTTPN..."	Essential	1
OG5_126654	PF3D7_1008000	histone deacetylase 2	(967-969)	1	... DDCNDVNTFTDINCGFAAIR<span class=\motif\">PPG</span>HHCSRSHPSGFCIFNNISVA..."	0.138	-2.924	Non - Mutable in CDS		PBANKA_1206200	histone deacetylase 2, putative	(668-670)	1	... SESNNINHISEIKCGFAAIR<span class=\motif\">PPG</span>HHCSRNNPSGFCIFNNISVA..."	Essential	1
OG5_127456	PF3D7_1008400	26S protease regulatory subunit 4, putative	(235-237)	1	... HPELYEDIGIKPPKGVILYG<span class=\motif\">PPG</span>TGKTLLAKAVANETSATFLR..."	0.745	-2.429	Non - Mutable in CDS		PBANKA_1206600	26S protease regulatory subunit 4, putative	(234-236)	1	... HPELYEDIGIKPPKGVILYG<span class=\motif\">PPG</span>TGKTLLAKAVANETSATFLR..."	Essential	1
OG5_153212	PF3D7_1019000	eukaryotic translation initiation factor subunit eIF2A, putative	(2382-2384)	1	... PMLPVRCCDSDRFVALNKLF<span class=\motif\">PPP</span>LKPFTVVPKPQPVLQWEEEL..."	0.17	-2.758	Non - Mutable in CDS		PBANKA_0503200	eukaryotic translation initiation factor subunit eIF2A, putative	(2087-2089)	1	... PMLPVRCCDSDRFIALNKLF<span class=\motif\">PPP</span>HKPFTIVPKPQPILQWEEEL..."	Essential	1
OG5_126538	PF3D7_1021900	PHAX domain-containing protein, putative	(1376-1378)	1	... LVENNTKNMFEENNKINITI<span class=\motif\">PPG</span>LSLPDINRALLHSAYLDNIT..."	0.385	-2.603	Non - Mutable in CDS		PBANKA_0506100	PHAX domain-containing protein, putative	(875-877)	1	... VDTSCGNNMFVENNKMNITI<span class=\motif\">PPG</span>LGLPDINRALLHGAYLDNIT..."	Essential	1
OG5_126599	PF3D7_1030100	pre-mRNA-splicing factor ATP-dependent RNA helicase PRP22, putative	(871-873), (896-898)	2	... EINTACEILHERMKKLESMS<span class=\motif\">PPP</span>LIILPIYSSLPSEMQSVIFEPA<span class=\"motif\">PPG</span>CRKCILATNIAEASLTIDGI..."	0.138	-2.78	Non - Mutable in CDS		PBANKA_0514100	pre-mRNA-splicing factor ATP-dependent RNA helicase PRP22, putative	(742-744), (767-769)	2	... EINTACEILHERMKKLESMS<span class=\motif\">PPP</span>LIILPIYSSLPSEMQSIIFEPA<span class=\"motif\">PPG</span>CRKCILATNIAEASLTIDGI..."	Essential	1
OG5_126636	PF3D7_1116800	heat shock protein 101	(683-685)	1	... IRVNMSEFTEAHSVSKITGS<span class=\motif\">PPG</span>YVGFSDSGQLTEAVREKPHS..."	0.119	-3.014	Non - Mutable in CDS		PBANKA_0931200	heat shock protein 101	(684-686)	1	... IRVNMSEFTEAHSVSKITGS<span class=\motif\">PPG</span>YVGFSDSGQLTEAVRERPHS..."	Essential	1
OG5_126735	PF3D7_1118600	histone acetyltransferase	(389-391)	1	... SFFKEYSELKRHIEKCEIRH<span class=\motif\">PPG</span>NEIYREEKISIFEIDGSYFR..."	0.313	-2.619	Non - Mutable in CDS		PBANKA_0929500	histone acetyltransferase, putative	(269-271)	1	... SFFKENVELIRHTGICEIRH<span class=\motif\">PPG</span>NEIYRNEKISIFEIDGNYFR..."	Essential	1
OG5_127491	PF3D7_1120100	phosphoglycerate mutase, putative	(122-124)	1	... ETAKKYGEEQVKIWRRSYDI<span class=\motif\">PPP</span>KLDKEDNRWPGHNVVYKNVP..."	0.127	-3.154	Non - Mutable in CDS		PBANKA_0928100	phosphoglycerate mutase, putative	(122-124)	1	... ETAKKYGEEQVKIWRRSYDI<span class=\motif\">PPP</span>KLDKEDNRWPGHNAVYKNVP..."	Essential	1
OG5_126558	PF3D7_1122900	dynein heavy chain, putative	(3390-3392)	1	... EEALNTLNKKNIQELKTLNK<span class=\motif\">PPP</span>GVEDITAAVMQLLATIDTTI..."	1	-1.219	Mutable in CDS		PBANKA_0925400	dynein heavy chain, putative	(80-82), (3411-3413)	2	... YLININNEKAKYENLLSKIN<span class=\motif\">PPP</span>RCYHNSCTLLDNHVVIFGGL... EEALNTLNKKNIQELKTLNK<span class=\"motif\">PPP</span>GVEDITAAVMQLLATIDTTI..."	Essential	1
OG5_127225	PF3D7_1123400	translation elongation factor EF-1, subunit alpha, putative	(348-350)	1	... PRASWYDLSKPTLFNILNSL<span class=\motif\">PPP</span>PWDENGPLRIPLLEGYKDNG..."	0.27	-2.63	Non - Mutable in CDS		PBANKA_0924900	translation elongation factor EF-1, subunit alpha, putative	(326-328)	1	... RGSWYDISKPTLFQILNSLS<span class=\motif\">PPP</span>WDENGPLRIPLLEGYKDNGI..."	Essential	1
OG5_126620	PF3D7_1128500	conserved protein, unknown function	(405-407)	1	... IKEFLYHVNWGILDYLIIDM<span class=\motif\">PPG</span>TNDIHLNLFESEKIDGIIMI..."	0.126	-3.032	Non - Mutable in CDS		PBANKA_0919700	conserved protein, unknown function	(373-375)	1	... ISEFVHNVNWGVLDYLIIDM<span class=\motif\">PPG</span>TSDIHLNLFESEHIDGIIMI..."	Essential	1
OG5_127786	PF3D7_1130400	26S protease regulatory subunit 6A, putative	(228-230)	1	... HKEKFEKIGIKPPKGVLMHG<span class=\motif\">PPG</span>TGKTLLARACASQTNATFLK..."	0.125	-3.028	Non - Mutable in CDS		PBANKA_0917900	26S protease regulatory subunit 6A, putative	(240-242)	1	... HKEKFEKIGIKPPKGVLMHG<span class=\motif\">PPG</span>TGKTLLARACASQTNATFLK..."	Essential	1
OG5_160611	PF3D7_1228700	conserved Plasmodium protein, unknown function	(907-909), (1061-1063)	2	... QFFDHIFFKDYLSDYVYISL<span class=\motif\">PPG</span>EYIEDPYTIKDEKNYEFTRF... KRFTSVHNHLQTSDGYKDMK<span class=\"motif\">PPP</span>GLEYLNPLIWDKTPDEHKKL..."	1	-2.702	Mutable in CDS		PBANKA_1443400	conserved Plasmodium protein, unknown function	(792-794)	1	... QFFDHIFFKDYLSDFVYISL<span class=\motif\">PPG</span>EFIEDAYAIKDEKNYDFTIF..."	Essential	1
OG5_127687	PF3D7_1230700	protein transport protein SEC13	(481-483), (488-490), (544-546), (615-617), (718-720), (760-762)	6	... TVSNNVISNFANNNTNQMKG<span class=\motif\">PPG</span>QMNE<span class=\"motif\">PPG</span>QMNGPPSQMNGPPSQMNGPP... TMQNSKKNNTSNLTPNMNNI<span class=\"motif\">PPP</span>TAPPLVVNNSHGASGPYAPS... SVTNMSVSSNINNNKSTFGG<span class=\"motif\">PPP</span>PLPSTSTTPIIPAAGSSNFP... PPRPSQYSNNLNLNPLSTSV<span class=\"motif\">PPP</span>AFSSDTQGMQNKNSITSNFNNNSNNSFSNFNSHMNQANL<span class=\"motif\">PPP</span>NPSVMNPSK…	0.989	-1.951	Non - Mutable in CDS		PBANKA_1445400	protein transport protein SEC13, putative	(405-407), (603-605), (657-659)	3	... VNNPMMQAEQNMLKHSSLQG<span class=\motif\">PPP</span>TIPNNTFKNNPYGQGTSPFA... GQFPNMNENKSSFSSQQIPG<span class=\"motif\">PPP</span>PAFPSASNEISGMNKVGNFP... VPPLKNMSVSNCPPMNYGQA<span class=\"motif\">PPP</span>PINPVNDPNYMKTNMQYNSY..."	Essential	1
OG5_130096	PF3D7_1235500	mRNA methyltransferase, putative	(166-168), (212-214)	2	... KNVHMNEYTSFMGMKSYPVA<span class=\motif\">PPP</span>NINHMININQNNIHAYNNTN... NNNNNNNIYMNNKFNDMKNI<span class=\"motif\">PPP</span>PLPNNNIPNVPNIPSPPSLP..."	0.498	-2.51	Non - Mutable in CDS		PBANKA_1450100	mRNA methyltransferase, putative	(75-77), (176-178), (181-183), (271-273)	4	... NYNNNPNFVNTNYSNYNNIA<span class=\motif\">PPP</span>SGIPPNNIPINNKNIYYIPQ... MGNNTNMFGTHVNNKYPDQV<span class=\"motif\">PPP</span>SV<span class=\"motif\">PPP</span>NTGDIYQYNNTNNAHNIHMK... SNNFIRDMKSYDYPFNDNIA<span class=\"motif\">PPP</span>LPNPNQIHPDNKFYNNNDNN..."	Essential	1
OG5_127354	PF3D7_1250300	vacuolar protein sorting-associated protein 26, putative	(93-95)	1	... NILNDKANSYDFFSISKDLE<span class=\motif\">PPG</span>FLVESKQFKWKFSAVDKQHE..."	0.138	-2.677	Non - Mutable in CDS		PBANKA_1463200	vacuolar protein sorting-associated protein 26, putative	(93-95)	1	... NILNDKCNSYDFFSISKDLE<span class=\motif\">PPG</span>FLIESKQFKWKFSSVDKQYE..."	Essential	1
OG5_127828	PF3D7_1306400	26S protease regulatory subunit 10B, putative	(179-181)	1	... NPYLYKRVGIKTPKGVLLYG<span class=\motif\">PPG</span>TGKTLLARAMASNINCNFMR..."	0.136	-2.646	Non - Mutable in CDS		PBANKA_1404900	26S protease regulatory subunit 10B, putative	(179-181)	1	... NPFLFKRVGIKTPKGVLLYG<span class=\motif\">PPG</span>TGKTLLARAMASNINCNFMR..."	Essential	1
OG5_128656	PF3D7_1309300	U4/U6 small nuclear ribonucleoprotein PRP3, putative	(480-482)	1	... KRKRQEKEREKQDKIRIGLM<span class=\motif\">PPP</span>PPKMKLSNLMRVMGDTALAQ..."	0.124	-3.064	Non - Mutable in CDS		PBANKA_1407800	U4/U6 small nuclear ribonucleoprotein PRP3, putative	(432-434)	1	... KRKRQEKEREKQDKIRIGLI<span class=\motif\">PPP</span>PPKMKLSNLMRVLGNSAVAQ..."	Essential	1
OG5_128056	PF3D7_1311500	26S protease regulatory subunit 7, putative	(204-206)	1	... QPERFVTLGIDPPKGVLLYG<span class=\motif\">PPG</span>TGKTLTARAIANRTDACFIC..."	0.924	-2.109	Non - Mutable in CDS		PBANKA_1410000	26S protease regulatory subunit 7, putative	(204-206)	1	... QPERFVTLGIDPPKGVLLYG<span class=\motif\">PPG</span>TGKTLTARAIANRTDACFIC..."	Essential	1
OG5_127237	PF3D7_1311900	V-type proton ATPase catalytic subunit A	(406-408)	1	... VKCIGSPSRIGSITIVGAVS<span class=\motif\">PPG</span>GDFSDPVTTATMSIVQAFWG..."	0.93	-2.245	Non - Mutable in CDS		PBANKA_1410400	V-type proton ATPase catalytic subunit A, putative	(406-408)	1	... VKCIGSPSRSGSITIVGAVS<span class=\motif\">PPG</span>GDFSDPVTTSTMSIVQAFWG..."	Essential	1
OG5_138355	PF3D7_1326300	RNA-binding protein, putative	(388-390), (391-393)	2	... NVINNTINNMHNYNNNPYNK<span class=\motif\">PPP</span><span class=\"motif\">PPP</span>GAPPQSLYMQNNLHSSLKNM..."	0.222	-2.712	Non - Mutable in CDS		PBANKA_1341500	RNA-binding protein, putative	(380-382)	1	... NVILPNYSNGEISLYGNKPL<span class=\motif\">PPP</span>GSPPLSVLKEMNNSNIQTKY..."	Essential	1
OG5_126691	PF3D7_1342100	aconitate hydratase	(184-186)	1	... LERFKFLKWGMNSFKNMLIL<span class=\motif\">PPG</span>SGIVHQINLEYLAHCVFNKD..."	0.807	-2.209	Mutable in CDS		PBANKA_1355200	aconitate hydratase, putative	(187-189)	1	... LERFKFLKWGMNSFENMLIL<span class=\motif\">PPG</span>SGIVHQINLEYLAHCVFENK..."	Essential	1
OG5_126672	PF3D7_1342600	myosin A	(73-75)	1	... VKCVVQQGSKKEKLTVVQID<span class=\motif\">PPG</span>TGTPYDIDPTHAWNCNSQVD..."	0.138	-3.027	Non - Mutable in CDS		PBANKA_1355700	myosin A	(73-75)	1	... VKCVVQHGSNQDKLNVVQID<span class=\motif\">PPG</span>NGTPYEIDIKNAWNCNSQVD..."	Essential	1
OG5_127960	PF3D7_1355100	DNA replication licensing factor MCM6	(303-305)	1	... EQSYFVDWQKIRLQEIAQES<span class=\motif\">PPG</span>SMPRNMDVILRNDIVDSVHA..."	0.122	-3.094	Non - Mutable in CDS		PBANKA_1131600	DNA replication licensing factor MCM6, putative	(309-311)	1	... EQSYFVDWQKIRLQEIAQES<span class=\motif\">PPG</span>SMPRNMDVILRNDIVDSVHA..."	Essential	1
OG5_127058	PF3D7_1359300	exosome complex exonuclease RRP44	(608-610), (829-831)	2	... PDEEYEKRNDFRNVLTFSID<span class=\motif\">PPG</span>CQDIDDALSVEFLQQDGNIE... RSVARIIFQNFKAASVLRRH<span class=\"motif\">PPP</span>KHEYLKELNDYLKTIQVFDF..."	1	-1.136	Mutable in CDS		PBANKA_1135600	exosome complex exonuclease RRP44, putative	(558-560), (773-775)	2	... PEEEFSKRIDFRNILTFSID<span class=\motif\">PPG</span>CQDIDDALSVEILEDEKIIK... RSVARIIFQNFKAACILRRH<span class=\"motif\">PPP</span>KYDTLKELDEYLQSIKVYDF..."	Essential	1
OG5_128483	PF3D7_1360200	ER membrane protein complex subunit 3, putative	(215-217)	1	... DRSQNNAMDNLMATHNPLAK<span class=\motif\">PPG</span>NMNNIPDLRKFFNKKKEELD..."	0.15	-2.813	Non - Mutable in CDS		PBANKA_1136400	ER membrane protein complex subunit 3, putative	(36-38)	1	MDALVLDERIRVHALLPIFIIVLLVCIIKSNLGQM<span class=\motif\">PPP</span>PLKMDIEKMRQNNFLSRFTQ..."	Essential	1
OG5_141156	PF3D7_1412700	AAA family ATPase, putative	(466-468), (877-879)	2	... YKHIYDAYHIDIHKGILLHG<span class=\motif\">PPG</span>CGKTYIALLIKEELSLLKKK... YKNIYDKYNIESPKGILLYG<span class=\"motif\">PPG</span>CSKTLFAKAIASEIHMNFIS..."	0.121	-3.052	Non - Mutable in CDS		PBANKA_1029900	AAA family ATPase, putative	(319-321), (699-701)	2	... YKNIYDQFNIDVNKGVLFHG<span class=\motif\">PPG</span>CGKTFLALAIKEELIILQKK... YKKLYEKYNIQTPKGILLYG<span class=\"motif\">PPG</span>CSKTLFAKAIASEINMNFIS..."	Essential	1
OG5_153550	PF3D7_1455300	conserved Plasmodium protein, unknown function	(220-222)	1	... IRQPPTVIVTNEPRPPLVIN<span class=\motif\">PPP</span>ANIIFKNKSPQPIYVNSTRP..."	1	-2.156	Mutable in CDS		PBANKA_1319000	conserved Plasmodium protein, unknown function	(181-183), (218-220)	2	... SNTQECSKAGINIIKPNYID<span class=\motif\">PPP</span>PIVLKNTQILPQLYIRQPPTVIVTNESRPPLVIN<span class=\"motif\">PPP</span>ANVIFKNKAPQPIYVNSTRP..."	Essential	1
OG5_126723	PF3D7_1461900	valine--tRNA ligase, putative	(88-90)	1	... KELIEENKNNEHIKKFVIIL<span class=\motif\">PPP</span>NVTGTLHIGHTLTVAIQDSL..."	0.123	-3.064	Non - Mutable in CDS		PBANKA_1325600	valine--tRNA ligase, putative	(96-98)	1	... KPKKELIENKDNAKKFVIVL<span class=\motif\">PPP</span>NVTGTLHIGHTLTVAIQDSL..."	Essential	1
OG5_128006	PF3D7_1462700	cytochrome c1 precursor, putative	(312-314)	1	... VELRNGLYYNTYFEGGSISM<span class=\motif\">PPP</span>LQDDMIEYEDGTPCNVSQMA..."	0.158	-2.857	Non - Mutable in CDS		PBANKA_1326300	cytochrome c1 precursor, putative	(312-314)	1	... VALRQGLYYNTYFPGGSISM<span class=\motif\">PPP</span>LQDDMIEYEDGTPCNVSQMA..."	Essential	1
OG5_127045	PF3D7_1463200	replication factor C subunit 3, putative	(54-56)	1	... ISTIKRFVQKGELPHLLLHG<span class=\motif\">PPG</span>TGKTSTILAVCKELYGDKRS..."	0.423	-2.458	Non - Mutable in CDS		PBANKA_1326800	replication factor C subunit 3, putative	(54-56)	1	... ISTIRKFVEKGELPHLLLHG<span class=\motif\">PPG</span>TGKTSTILAVCKELYGESRS..."	Essential	1
OG5_128315	PF3D7_1468800	splicing factor U2AF large subunit, putative	(550-552)	1	... LDSIPYNNYCLRIGRPHDYI<span class=\motif\">PPP</span>EGDPAFTTVFTDINMDVFEK..."	0.154	-2.78	Non - Mutable in CDS		PBANKA_1332000	splicing factor U2AF large subunit, putative	(422-424)	1	... LDSMSYNNYCLRINRPHDYM<span class=\motif\">PPP</span>EGDPALTVVFPDIDMGLLES..."	Essential	1
OG5_127493	PF3D7_1469600	acetyl-CoA carboxylase, putative	(3176-3178)	1	... LNSQIIEMYADVNSKGGILE<span class=\motif\">PPG</span>IVEVKFRYPDIRKLMHSIDT..."	1	-2.092	Mutable in CDS		PBANKA_1332800	acetyl-CoA carboxylase	(484-486), (2806-2808)	2	... DDDIKSNSKYISLSDKVIKV<span class=\motif\">PPG</span>KNCYNYANVSLIVDIAKKEK... LNSQIIEMYADNNSKGGILE<span class=\"motif\">PPG</span>LVEVKFKFAEIKKLMNNSDP..."	Essential	1
OG5_146219	PF3D7_0814300	AAA family ATPase, putative	(718-720)	1	... YSNIYKHLGINKSMGILLYG<span class=\motif\">PPG</span>CGKTMLAKAISNEMKANFIA..."	0.14	-2.837	Non - Mutable in CDS		PBANKA_1423200	AAA family ATPase, putative	(613-615)	1	... YSNIYKHLGINKSMGILLYG<span class=\motif\">PPG</span>CGKTMLAKAISNEMKANFIA..."	Insufficient data	1
OG5_128813	PF3D7_0109200	cleavage and polyadenylation specificity factor subunit 5, putative	(189-191)	1	... PKEYIRLYQVILSPKCIFHL<span class=\motif\">PPG</span>FTLKAIPLFDLNNCGLAISG..."	0.125	-3.001	Non - Mutable in CDS		PBANKA_0204400	cleavage and polyadenylation specificity factor subunit 5, putative	(197-199)	1	... PKECAKLYQVTIPDKCIFHL<span class=\motif\">PPG</span>FTLKAIPLFDLNNCGIAISG..."	no data	1
OG5_162016	PF3D7_0203400	conserved Plasmodium protein, unknown function	(81-83)	1	... LDVNNENKKSDRRTNVKVNQ<span class=\motif\">PPG</span>GASSIIFG"	0.998	-2.427	Mutable in CDS		PBANKA_0301300	conserved Plasmodium protein, unknown function	(81-83)	1	... SDIKKTTNQSDRKTNVKVNQ<span class=\motif\">PPG</span>GASSIIFG"	no data	1
OG5_126885	PF3D7_0311700	plasmepsin VI	(395-397)	1	... EGDTENNTLECVIGIMPLDV<span class=\motif\">PPP</span>RGPIFIFGNSFIRKYYTIFD..."	1	-0.936	Mutable in CDS		PBANKA_0409700	plasmepsin VI, putative	(404-406)	1	... ENSEEDNSSQCVIGLMSLDI<span class=\motif\">PPP</span>RGPIFIFGNVFIRKYYTIFD..."	no data	1
OG5_130799	PF3D7_0405700	lysine decarboxylase, putative	(1510-1512)	1	... LKDRIRHKEMIVAASFIIPY<span class=\motif\">PPG</span>FPVLVPGQIISEEIVNYLSG..."	1	-1.317	Mutable in CDS		PBANKA_1003400	lysine decarboxylase, putative	(1372-1374)	1	... LKERVKHNGMVVSASFIIPY<span class=\motif\">PPG</span>FPVLVPGQIVSHEILDYLSG..."	no data	1
OG5_161768	PF3D7_0504800	conserved Plasmodium protein, unknown function	(5635-5637)	1	... KNKNEFIDLSNIPLLTLPKI<span class=\motif\">PPP</span>IS"	0.985	-2.72	Mutable in CDS		PBANKA_1104400	conserved Plasmodium protein, unknown function	(4472-4474)	1	... SKNYIYDEGSNISLMFVPKV<span class=\motif\">PPP</span>IS"	no data	1
OG5_127702	PF3D7_0510500	topoisomerase I	(305-307)	1	... PYTYALVDWIREKISSNKAE<span class=\motif\">PPG</span>LFRGRGEHPKQGLLKKRIFP..."	0.12	-3.151	Non - Mutable in CDS		PBANKA_1110100	topoisomerase I, putative	(352-354)	1	... PYTFALVDWIREKISSNKAE<span class=\motif\">PPG</span>LFRGRGEHPKQGLLKKRIFP..."	no data	1
OG5_128707	PF3D7_0528500	F-actin-capping protein subunit alpha, putative	(20-22)	1	MNNMLNEKKNFIRHVLMNS<span class=\motif\">PPG</span>KLYDLVKDINILLGSSVSIQ..."	0.934	-2.403	Mutable in CDS		PBANKA_1243100	F-actin-capping protein subunit alpha	(20-22)	1	MDSLLNEKKKFIRHVLSNA<span class=\motif\">PPG</span>KVFDLISNLKTIFGSNAIIQ..."	no data	1
OG5_155454	PF3D7_0605100	RNA-binding protein, putative	(104-106)	1	... IEKACGAVIKCQKEFDVSVY<span class=\motif\">PPP</span>SEKILTIFGKKENKKKALEL..."	0.597	-2.506	Non - Mutable in CDS		PBANKA_0103900	RNA-binding protein, putative	(113-115), (254-256)	2	... IEKVCDVIIKCQKEFDISVY<span class=\motif\">PPP</span>SEKILTVSGKKENKKKALEL... AEFPGVSKNFTSPINIGLCG<span class=\"motif\">PPP</span>INGPSSFHENSTANGVSGVS..."	no data	1
OG5_129472	PF3D7_0609400	mitochondrial cardiolipin synthase, putative	(370-372)	1	... DYIIRNGATNNIYITTSYFL<span class=\motif\">PPG</span>FLRRALFSALYKGVNISFLF..."	0.132	-2.943	Non - Mutable in CDS		PBANKA_0108000	mitochondrial cardiolipin synthase, putative	(346-348)	1	... EYIIKNGANNNIYITTSYFL<span class=\motif\">PPG</span>FLRRALFYALSNGVNISFLF..."	no data	1
OG5_146660	PF3D7_0703500	erythrocyte membrane-associated antigen	(1815-1817)	1	... DSQKLACLSALTRRLTLVQG<span class=\motif\">PPG</span>TGKTHVACAIIDSWHKQNSN..."	0.122	-2.946	Non - Mutable in CDS		PBANKA_0801200	erythrocyte membrane-associated antigen, putative	(953-955), (1555-1557)	2	... SNHNNIGNDNINGMNSEVPL<span class=\motif\">PPG</span>ISDPSELIVYGLTKQDASSI... DSQKLACLSALTRRLTLVQG<span class=\"motif\">PPG</span>TGKTHVACAIIDSWHRQNSS..."	no data	1
OG5_129958	PF3D7_0707400	AAA family ATPase, putative	(363-365)	1	... NSLKNSNKYNLYLKNILLHG<span class=\motif\">PPG</span>TGKTLFAKTLSYHSNFDYII..."	0.13	-3.204	Non - Mutable in CDS		PBANKA_0804600	AAA family ATPase, putative	(363-365)	1	... NSMQNSKKYDLYLKNILLHG<span class=\motif\">PPG</span>TGKTLFAKTLSYYSNFDYII..."	no data	1
OG5_157730	PF3D7_0723400	conserved Plasmodium protein, unknown function	(623-625), (717-719), (732-734)	3	... PLKKNNNLQSTHIDANNNII<span class=\motif\">PPP</span>PSTDNRFFNISRKSLLLIPN... IENSNLNNAPNINITSNNNI<span class=\"motif\">PPP</span>PDTDINKNKMIA<span class=\"motif\">PPP</span>YAGDNTASVNPHIPNFHSGV..."	1	-2.317	Mutable in CDS		PBANKA_0620900	conserved Plasmodium protein, unknown function	(429-431), (531-533), (575-577)	3	... LNPQKNIQPNTSIEPNNMVI<span class=\motif\">PPP</span>PSSDGTFYNNMNIPHSNSRK... DMKFENQGLNMTNKNLMNNI<span class=\"motif\">PPP</span>PDSDLKKNMIIPPSAPPYNE... NLTIPGNMNIFNNNNSRNIV<span class=\"motif\">PPP</span>YGNIGDNNMLNQNNKNISNP..."	no data	1
OG5_126558	PF3D7_0729900	dynein heavy chain, putative	(2791-2793)	1	... RHETILEGWLHLKKPFILCG<span class=\motif\">PPG</span>SGKTMTLTSVLKKSSEFDIA..."	1	-0.74	Mutable in CDS		PBANKA_0214000	dynein heavy chain, putative	(2845-2847)	1	... RHATILEGWLNLKKPFILCG<span class=\motif\">PPG</span>SGKTMTLTSVLKKSTEFDIA..."	no data	1
OG5_167347	PF3D7_0805300	conserved Plasmodium protein, unknown function	(19-21)	1	MIRIYPYPFSKYVKSLPD<span class=\motif\">PPP</span>GKSRDIKNFECKKYDNDYTW..."	1	-1.399	Mutable in CDS		PBANKA_1225300	conserved Plasmodium protein, unknown function	(19-21)	1	MIKIYPYPFSKYVKSLPD<span class=\motif\">PPP</span>YKSREIRKFECKKYENDYNW..."	no data	1
OG5_146249	PF3D7_0822100	mediator of RNA polymerase II transcription subunit 7, putative	(11-13), (81-83)	2	MADENYVSGY<span class=\motif\">PPP</span>PYYYKEYQSVDIKKLMEMSN... YIKNIESIDNIKNCNFIMGR<span class=\"motif\">PPP</span>LPLRNSYNVFGIDYELQRNI..."	0.171	-3.325	Non - Mutable in CDS		PBANKA_0708700	mediator of RNA polymerase II transcription subunit 7, putative	(9-11), (100-102)	2	MENFVSGY<span class=\motif\">PPP</span>PYYFHEYEEADTEVNSILEK... TLEKINQENEKGMCKFLFGR<span class=\"motif\">PPP</span>IPLKDNYNIFGINYDTDRKV..."	no data	1
OG5_126777	PF3D7_0826400	dehydrodolichyl diphosphate synthetase, putative	(249-251)	1	... YNEEQLEIVNYHNKLLTSDL<span class=\motif\">PPP</span>NILIRTSGEQRLSDFMLYQI..."	0.173	-3.257	Non - Mutable in CDS		PBANKA_0704200	dehydrodolichyl diphosphate synthetase, putative	(238-240)	1	... LDENQIKILNYHNKLLTSDI<span class=\motif\">PPP</span>DILIRTSGEQRLSDFLLYQI..."	no data	1
OG5_205378	PF3D7_0913800	conserved Plasmodium protein, unknown function	(67-69)	1	... QISEKKSERPIAKKKQLDVK<span class=\motif\">PPP</span>VKAIPKIAPKNIQRRDN"	0.847	0	Non - Mutable in CDS		PBANKA_0814800	conserved Plasmodium protein, unknown function	(48-50)	1	... EKNDSPFKLKSAKKIALDVK<span class=\motif\">PPP</span>VKAVPKIAPKYAQRKGSSKK..."	no data	1
OG5_128698	PF3D7_0918900	gamma-glutamylcysteine synthetase	(784-786)	1	... SSHQHFENFQSTNWNSVRFK<span class=\motif\">PPP</span>ILDNHFKGPSSIGWRVEFRT..."	0.137	-2.846	Non - Mutable in CDS		PBANKA_0819800	gamma-glutamylcysteine synthetase	(683-685)	1	... SSHQHFENFQSTNWNSVRFK<span class=\motif\">PPP</span>ILDNNYLNGPSSIGWRVEFR..."	no data	1
OG5_127012	PF3D7_0921000	ubiquitin-conjugating enzyme E2, putative	(95-97)	1	... QEMWHPNVFPDGRVCISILH<span class=\motif\">PPG</span>VDIYNEQEKPEERWRPIWSV..."	1	-0.583	Mutable in CDS		PBANKA_0821900	ubiquitin-conjugating enzyme E2, putative	(95-97)	1	... QEMWHPNVYPDGRVCISILH<span class=\motif\">PPG</span>IDIYNEQEKPEERWRPIWSV..."	no data	1
OG5_148087	PF3D7_0932900	conserved Plasmodium protein, unknown function	(12-14)	1	MNKKNTTYDIL<span class=\motif\">PPP</span>LEKIHKNVEKKDIIHNNNNI..."	1	-1.138	Mutable in CDS		PBANKA_0833700	conserved Plasmodium protein, unknown function	(51-53)	1	... VYVPSLKQKKMNRQGKYDIF<span class=\motif\">PPP</span>LEKINNNNNNNNKTEVPKTC..."	no data	1
OG5_160581	PF3D7_1009300	conserved Plasmodium protein, unknown function	(572-574)	1	... KISPDYYLYFKQRKDKMEKH<span class=\motif\">PPG</span>YLKRVRLHGQIWGNFHADKR..."	0.122	-3.117	Non - Mutable in CDS		PBANKA_1207600	conserved Plasmodium protein, unknown function	(560-562)	1	... NMPDEYYLYYKQRRDKMEKN<span class=\motif\">PPG</span>YLKRVKLQGKIWGNFHANKK..."	no data	1
OG5_128456	PF3D7_1010200	DNA2/NAM7 helicase, putative	(715-717)	1	... YQLRAINNSILNDGITLIQG<span class=\motif\">PPG</span>TGKTTTILGIISALIFYEKD..."	0.132	-2.94	Non - Mutable in CDS		PBANKA_1208600	DNA2/NAM7 helicase, putative	(577-579)	1	... CQLRAINNSILNEGITLIQG<span class=\motif\">PPG</span>TGKTTTILGIISALIFYQKN..."	no data	1
OG5_149657	PF3D7_1020500	ribosomal silencing factor RsfS, putative	(479-481)	1	... PHEHFDSTNFPSFFDYTPGI<span class=\motif\">PPP</span>YLVRSNASMDSYKNDDIYTK..."	0.389	-2.719	Non - Mutable in CDS		PBANKA_0504700	ribosomal silencing factor RsfS, putative	(405-407)	1	... PHEHFDNKNFPSFFDYTPGI<span class=\motif\">PPP</span>YIIRSNSTLDSYHNDNLYQK..."	no data	1
OG5_153785	PF3D7_1022000	RNA-binding protein, putative	(512-514)	1	... IPHQNTMHYSKENFSLLKDG<span class=\motif\">PPG</span>ANLFLYGIPLKWTELNLIQL..."	1	-1.001	Mutable in CDS		PBANKA_0506200	RNA-binding protein, putative	(351-353)	1	... IPNQNTLHYSKANFSLLKDG<span class=\motif\">PPG</span>ANLFLYGIPLKWTELNLIQL..."	no data	1
OG5_128067	PF3D7_1112600	DNA helicase, putative	(221-223)	1	... NPLITKILDEDLNFNLILCG<span class=\motif\">PPG</span>SGKSSLVNVIRNKTNNCFIS..."	0.134	-2.843	Non - Mutable in CDS		PBANKA_0935000	conserved Plasmodium protein, unknown function	(200-202)	1	... NPLLTKILDEDLNFNLILCG<span class=\motif\">PPG</span>SGKSSLINVIKNKTHNLFIT..."	no data	1
OG5_162577	PF3D7_1125700	kelch domain-containing protein, putative	(184-186)	1	... DTYMYCIKDKTWEHIKVKFS<span class=\motif\">PPP</span>VFGHVSFKYKNIIFIHGGNM..."	0.79	-2.968	Mutable in CDS		PBANKA_0922600	kelch domain-containing protein, putative	(183-185)	1	... TTFMYNINNNTWNKINVKYS<span class=\motif\">PPP</span>VFGHVSFKYKNIVFIHGGNM..."	no data	1
OG5_127051	PF3D7_1130200	60S ribosomal protein P0	(124-126)	1	... DNKSPAPARLGVIAPIDVFI<span class=\motif\">PPG</span>PTGMDPSHTSFFQSLGISTK..."	0.208	-2.596	Non - Mutable in CDS		PBANKA_0918000	60S acidic ribosomal protein P0, putative	(124-126)	1	... QNKSPAPARLGVIAPIDVFI<span class=\motif\">PPG</span>PTGMDPSHTSFFQSLGISTK..."	no data	1
OG5_149451	PF3D7_1208900	protein phosphatase PPM11, putative	(559-561)	1	... NNTSSNINSFYSVNKSHNST<span class=\motif\">PPG</span>VIKVKNSNNVNNSNNTGNSQ..."	1	-2.475	Mutable in CDS		PBANKA_0607400	protein phosphatase PPM11, putative	(455-457)	1	... YNTTSIHQNVSNNGRISLSQ<span class=\motif\">PPG</span>NRIYYNLNESIYVDALKYKI..."	no data	1
OG5_159753	PF3D7_1211000	kinesin-7, putative	(982-984)	1	... KFIMKLMQKLGLSAILTGTV<span class=\motif\">PPG</span>RNIENVLKLQENLKDDLRLA..."	1	0.076	Mutable in CDS		PBANKA_0609500	kinesin-7, putative	(908-910)	1	... KFIMKLMQKVGLSTILTGVV<span class=\motif\">PPG</span>RNIENVLKLQENLKDDLKIH..."	no data	1
OG5_167473	PF3D7_1216700	perforin-like protein 2	(822-824)	1	... HNIISVGEYLEKCTQKLYAG<span class=\motif\">PPP</span>GLLTCPIGTTILMGFSINLN..."	1	-2.741	Mutable in CDS		PBANKA_1432400	perforin-like protein 2	(749-751)	1	... NEISIGDYLEKSIQKIYHGA<span class=\motif\">PPG</span>LLICPIGSTILMGFSLNLDF..."	no data	1
OG5_152384	PF3D7_1219000	formin 2	(2320-2322), (2368-2370)	2	... DKQIKAKAIEALLKQSKAKR<span class=\motif\">PPP</span>PLPAALLKSVNVAKEKPEMK... KTENNTKLAFTKKGGKKIPA<span class=\"motif\">PPP</span>FLLKKMGDKSKCVLKKCPEA..."	1	-2.285	Mutable in CDS		PBANKA_1434600	formin 2, putative	(1993-1995), (2061-2063)	2	... GPSTKAISAKTIIKKSTQKK<span class=\motif\">PPP</span>PLPKSLAKAGSPKEAIEPQP... PEFLLNKMSNGKSKGVLKKC<span class=\"motif\">PPG</span>LCLKKAEKLEEKRPLGIKLH..."	no data	1
OG5_126616	PF3D7_1239700	ATP-dependent zinc metalloprotease FTSH 1	(190-192)	1	... NREKYHEMGARMPKGVLLVG<span class=\motif\">PPG</span>SGKTMLARAVATEANVPYIY..."	1	-1.017	Mutable in CDS		PBANKA_1454100	ATP-dependent zinc metalloprotease FTSH 1, putative	(205-207)	1	... NRERYQEMGARMPKGVLLVG<span class=\motif\">PPG</span>SGKTMLARAVATEANVPYIY..."	no data	1
OG5_127606	PF3D7_1248900	26S protease regulatory subunit 8, putative	(221-223)	1	... HPEIFESLGISQPKGVLLYG<span class=\motif\">PPG</span>TGKTLLARAVAHHTDCTFIR..."	0.988	-2.052	Non - Mutable in CDS		PBANKA_1461800	26S protease regulatory subunit 8, putative	(208-210)	1	... HPEIFESLGISQPKGVLLYG<span class=\motif\">PPG</span>TGKTLLARAVAHHTDCTFIR..."	no data	1
OG5_144062	PF3D7_1249800	THO complex subunit 2, putative	(2793-2795), (2809-2811)	2	... PMPKNIYNPNAYPIVQNTIN<span class=\motif\">PPP</span>KPYMKDSNYNNKV<span class=\"motif\">PPP</span>QEPNNLIHTSTRNAILINGN..."	0.126	-3.089	Non - Mutable in CDS		PBANKA_1462700	THO complex subunit 2, putative	(2173-2175)	1	... MPNALNLPPKPFMKENFNKI<span class=\motif\">PPP</span>QEPNKYMLKRRYRYF"	no data	1
OG5_156397	PF3D7_1302500	conserved Plasmodium protein, unknown function	(1840-1842)	1	... QIEAVKLILLNKNNISLIQG<span class=\motif\">PPG</span>TGKTKTVIGIVSVLYALLYK..."	1	-0.829	Mutable in CDS		PBANKA_1401000	conserved Plasmodium protein, unknown function	(1767-1769)	1	... QIDAVKLVFLNKNSISLIQG<span class=\motif\">PPG</span>TGKTKTVIGIISALYALMND..."	no data	1
OG5_137532	PF3D7_1318200	glycerol-3-phosphate 1-O-acyltransferase	(343-345)	1	... KRSKVKTHFIGLALNTYNIC<span class=\motif\">PPP</span>NTIDVDEIEKERTCNYSPVY..."	1	0.463	Mutable in CDS		PBANKA_1416700	glycerol-3-phosphate 1-O-acyltransferase	(349-351)	1	... KRSNVKTHFVGMALNTYNIC<span class=\motif\">PPP</span>NTIDIDEIEKERSCSYSPVG..."	no data	1
OG5_150041	PF3D7_1341800	inner membrane complex protein 1k, putative	(314-316)	1	... IEKIVYVQKLIPKFDVNLEC<span class=\motif\">PPP</span>LIVPYPVQRIKQISPVMVKK..."	0.269	-2.726	Non - Mutable in CDS		PBANKA_1354900	inner membrane complex protein 1k, putative	(330-332)	1	... IEKIIYIQKFVPKFDVNLEC<span class=\motif\">PPP</span>LIVPYPVQTIKHMPPIMVKK..."	no data	1
OG5_165468	PF3D7_1343800	conserved Plasmodium protein, unknown function	(1648-1650), (4394-4396)	2	... SKNKKNKKTKLNNIRRSSSC<span class=\motif\">PPP</span>KNINIYFDSSNKSDILYNDR... NVNKSSIFKEYFHKYNTKPS<span class=\"motif\">PPP</span>TYTLKVDKKIEYLIENQNKD..."	1	-1.279	Mutable in CDS		PBANKA_1356800	conserved Plasmodium protein, unknown function	(4108-4110)	1	... NTNQNGIFKEYFHKYNNIPS<span class=\motif\">PPP</span>TYTLKIDKKIEKYIQNNIGD..."	no data	1
OG5_142516	PF3D7_1353700	reactive oxygen species modulator 1, putative	(26-28), (58-60)	2	MMNWFRKKDSNENKKVKSEYDEYVT<span class=\motif\">PPP</span>FGNYLVSEPKKPKSLKNDKTAITEFKGFT<span class=\"motif\">PPP</span>KFEFKEDISDNKYEEDFSKY..."	0.132	-3.072	Non - Mutable in CDS		PBANKA_1130300	reactive oxygen species modulator 1, putative	(26-28), (58-60)	2	MMNWFKKKETTEETQVKSEYDSYVT<span class=\motif\">PPP</span>FGNYLAKKPEKPKSLKNEKINVTEFKGFT<span class=\"motif\">PPP</span>KFEFKQDTTDSQYDQDFSKY..."	no data	1
OG5_126974	PF3D7_1359400	CUGBP Elav-like family member 1	(366-368)	1	... FETLFMNNSANMHNLSESSG<span class=\motif\">PPG</span>ANLFIFHVPNEWQQTDLIQA..."	0.305	-2.595	Non - Mutable in CDS		PBANKA_1135700	CUGBP Elav-like family member 1, putative	(367-369)	1	... FETLFMNNNPNIHNLSDSSG<span class=\motif\">PPG</span>ANLFIFHVPNEWQQTDLIQA..."	no data	1
OG5_147425	PF3D7_1360000	conserved Plasmodium protein, unknown function	(79-81)	1	... NAWTSMFAFAFMLWYSRIFD<span class=\motif\">PPP</span>LERIDKYWLNSPKFRILSAF..."	0.124	-3.107	Non - Mutable in CDS		PBANKA_1136200	conserved Plasmodium protein, unknown function	(79-81)	1	... NAWTSMFAFAFFLWYSRIFD<span class=\motif\">PPP</span>LERVDRYWLNSPKFRILSAF..."	no data	1
OG5_126745	PF3D7_1415800	dimethyladenosine transferase, putative	(239-241)	1	... NVKLFCKVTKVCNVNRSSFN<span class=\motif\">PPP</span>KVDSVIVKLIPKESSFLTNF..."	0.156	-3.214	Non - Mutable in CDS		PBANKA_1026900	dimethyladenosine transferase, putative	(240-242)	1	... NVKLFCRVIKVCNVDRSSFN<span class=\motif\">PPP</span>KVDSIVLKLIPKENNSMINF..."	no data	1
OG5_128129	PF3D7_1438000	eukaryotic translation initiation factor eIF2A, putative	(630-632)	1	... LVNLNGYLSSKLPDREKSSL<span class=\motif\">PPG</span>CNFVNENKNYNKKKKKKRSS..."	1	-2.687	Mutable in CDS		PBANKA_0610800	eukaryotic initiation factor 2a, putative	(602-604)	1	... KTSLNGLGIMTRSLKPKSNM<span class=\motif\">PPG</span>CNFVVEEKTNKKKKKKKNPK..."	no data	1
OG5_129977	PF3D7_1450600	S-adenosylmethionine-dependent methyltransferase, putative	(492-494)	1	... LSKSNNYKFFQKTYDVILID<span class=\motif\">PPP</span>LARNNYCLPSALKIYEKLLY..."	0.223	-2.648	Non - Mutable in CDS		PBANKA_1314300	S-adenosylmethionine-dependent methyltransferase, putative	(436-438)	1	... LIKNNNYDFFKKKYDVILID<span class=\motif\">PPP</span>LARNNYLLPAALKVYQKLLY..."	no data	1
OG5_129437	PF3D7_1454000	RNA-binding protein, putative	(9-11)	1	MDSLYGDL<span class=\motif\">PPP</span>VSSNKKTGGNNEKKNLINEE..."	0.244	-2.624	Non - Mutable in CDS		PBANKA_1317700	RNA-binding protein, putative	(9-11)	1	MDSLYGDL<span class=\motif\">PPP</span>VSTQNNNVKNNDNKNSPSEV..."	no data	1
OG5_127508	PF3D7_1457500	vacuolar protein sorting-associated protein 4	(155-157)	1	... KFPKLFNSSTLPYKGILLYG<span class=\motif\">PPG</span>TGKTFLALACSNECNMNFFN..."	0.12	-3.019	Non - Mutable in CDS		PBANKA_1321200	vacuolar protein sorting-associated protein 4, putative	(155-157)	1	... KFPKLFNSSALPYKGILLYG<span class=\motif\">PPG</span>TGKTFLALACANECNMNFFN..."	no data	1
OG5_126654	PF3D7_1472200	histone deacetylase, putative	(1681-1683)	1	... RIQNNSIIPNNRKKIFCVVR<span class=\motif\">PPG</span>HHLGTFGAAQFNLTDEDVAA..."	0.151	-2.835	Non - Mutable in CDS		PBANKA_1335400	histone deacetylase, putative	(1201-1203)	1	... DYISSKNSKKNKKKIFCVVR<span class=\motif\">PPG</span>HHLGTFGAAQFNLSDEDKAA..."	no data	1
OG5_147370	PF3D7_1472700	DNA-directed RNA polymerase, alpha subunit, putative	(798-800)	1	... LMNPDNFPKHSNIQLPIQDT<span class=\motif\">PPP</span>FLDTLEWLKMEVKKENNKKN..."	0.168	-2.71	Non - Mutable in CDS		PBANKA_1335900	DNA-directed RNA polymerase, alpha subunit, putative	(744-746)	1	... LMDPGNFPKHSNIMLPLQQT<span class=\motif\">PPP</span>YIDTLDWLKMEVNKDKNSTK..."	no data	1
OG5_168948	PF3D7_API03600	chaperone protein ClpM	(543-545)	1	... IRFDMSEYMEKHSISRLIGS<span class=\motif\">PPG</span>YVGYSEGGQLTEQVYKKPNS..."	null	null	null		PBANKA_API00206	chaperone protein ClpM, putative	(529-531)	1	... IRFDMSEYMEKHSISRLIGS<span class=\motif\">PPG</span>YIGYSEGGQLTEQVYNKPNC..."	no data	1
OG5_166876	PF3D7_0215500	conserved Plasmodium protein, unknown function	(393-395), (399-401), (416-418), (419-421)	4	... NYYNNYYLYTNYQKHKNNKI<span class=\motif\">PPP</span>PSG<span class=\"motif\">PPP</span>NNIKYNNVHPNNYN<span class=\"motif\">PPP</span><span class=\"motif\">PPP</span>GTLQTFNTNDSFKGLSSYDN..."	1	-0.99	Mutable in CDS		PBANKA_0312200	conserved Plasmodium protein, unknown function	(253-255)	1	... DYNINSKYRYNNTFIQNNNI<span class=\motif\">PPP</span>PPTSPPHSAYLNNESKQFPL..."	Slow	1
OG5_127165	PF3D7_0217100	ATP synthase F1, alpha subunit	(328-330)	1	... FDDLSKQAVAYRQLSLLLRR<span class=\motif\">PPG</span>REAYPGDIFYIHSKLLERSS..."	0.141	-2.779	Non - Mutable in CDS		PBANKA_0313800	ATP synthase F1, alpha subunit, putative	(326-328)	1	... YDDLSKQAVAYRQLSLLLRR<span class=\motif\">PPG</span>REAYPGDIFYIHSKLLERSS..."	Slow	1
OG5_128040	PF3D7_0218000	replication factor C subunit 2, putative	(45-47)	1	... VMMLKEVVRTKNMPHLIFHG<span class=\motif\">PPG</span>TGKTSAINALAHELFGKENI..."	0.12	-3.168	Non - Mutable in CDS		PBANKA_0314700	replication factor C subunit 2, putative	(45-47)	1	... ISMLKEVIKTKNMPHLIFHG<span class=\motif\">PPG</span>TGKTSAINALAHELFGKENI..."	Slow	1
OG5_127204	PF3D7_0309500	asparagine synthetase [glutamine-hydrolyzing], putative	(183-185)	1	... IWFSSEFKALKDNCIRYVIF<span class=\motif\">PPG</span>HYYKNNKNKGEFVRYYNPNW..."	1	-2.521	Mutable in CDS		PBANKA_0407600	asparagine synthetase [glutamine-hydrolyzing]	(183-185)	1	... IWFASEFKALRIYCVRYVAF<span class=\motif\">PPG</span>HYYMCNNGKGEFVRYYNPNW..."	Slow	1
OG5_127831	PF3D7_0413600	26S protease regulatory subunit 6B, putative	(180-182)	1	... CPELYEKIGIEPPMGILIYG<span class=\motif\">PPG</span>TGKTMLVKAVANETQVTFIG..."	0.191	-2.71	Non - Mutable in CDS		PBANKA_0715600	26S protease regulatory subunit 6B, putative	(183-185)	1	... SPELYEKIGIEPPMGILIYG<span class=\motif\">PPG</span>TGKTMLVKAVANETKVTFIG..."	Slow	1
OG5_161387	PF3D7_0416000	RNA-binding protein, putative	(127-129), (135-137), (138-140), (431-433)	4	... NNHVSNNKSNKPIIISSHII<span class=\motif\">PPP</span>PPTFK<span class=\"motif\">PPP</span><span class=\"motif\">PPP</span>PKEKNKIEKWTLRKNAAYSM... LKKNVFKENAGGFPNYPKEG<span class=\"motif\">PPP</span>NHFSSRKLSEPIINMCPSNM..."	1	0.692	Mutable in CDS		PBANKA_0717900	RNA-binding protein, putative	(79-81), (85-87), (88-90)	3	... NNKKVIQNKTKKKINGPLAC<span class=\motif\">PPP</span>PTH<span class=\"motif\">PPP</span><span class=\"motif\">PPP</span>PPFIPKEKQQNWKLKKQTNN..."	Slow	1
OG5_144201	PF3D7_0416400	histone acetyltransferase, putative	(187-189)	1	... DKKLVKKNSYEELVRNAMYK<span class=\motif\">PPG</span>YIIYEKHISKDIILQIRKCG..."	0.401	-2.625	Non - Mutable in CDS		PBANKA_0718400	histone acetyltransferase, putative	(193-195)	1	... KSRNIKDKHYKNIINRNNYI<span class=\motif\">PPG</span>FVIYEKKLSEKIYLQIRKCG..."	Slow	1
OG5_146727	PF3D7_0823200	RNA-binding protein, putative	(147-149)	1	... KPKEMSATNFPGKGSAPSFG<span class=\motif\">PPG</span>ANVFVFHLPSHWTDMELYQH..."	0.941	-2.165	Non - Mutable in CDS		PBANKA_0707400	RNA-binding protein, putative	(149-151)	1	... KPKEITPVNYPVKNTVASFG<span class=\motif\">PPG</span>ANVFVFHLPSHWTDMELYQH..."	Slow	1
OG5_128694	PF3D7_0826500	ubiquitin conjugation factor E4 B, putative	(664-666)	1	... MKTCLNEHNNSLVHLVLKCC<span class=\motif\">PPP</span>NEKYYNNTKEGTTEGTNIVS..."	0.905	-2.783	Mutable in CDS		PBANKA_0704100	ubiquitin conjugation factor E4 B, putative	(608-610)	1	... MKSYLDEHKGKYSHLVLKAC<span class=\motif\">PPP</span>NESNNEICKSYSHRNTGTNI..."	Slow	1
OG5_152972	PF3D7_1036900	conserved Plasmodium protein, unknown function	(1219-1221), (1547-1549), (1642-1644)	3	... LMNMGMNNLNNNNMYSTYNS<span class=\motif\">PPG</span>LANQYNYSYGNLSYPYNNMP... SKQLYHNSNYYNINSSSFNI<span class=\"motif\">PPG</span>FNMSQDKEQNNNYLNNNITT... NRDNNNNFFNYNNFSYALQT<span class=\"motif\">PPG</span>LQNYYQNTQYQQQNNYNNRN..."	0.141	-2.875	Non - Mutable in CDS		PBANKA_0519900	conserved Plasmodium protein, unknown function	(1133-1135), (1455-1457), (1553-1555)	3	... LINLGMNNLSNNNMYNSYNS<span class=\motif\">PPG</span>LANQFNYSFTNLSYPYNNMH... LNKQLYHNNYYNINSNSYNI<span class=\"motif\">PPG</span>FNMSQDKEQNANYLNNSVTT... TRDNTNTFFNYNNFSYALQT<span class=\"motif\">PPG</span>LQNYYQNTQYQQQNNYNRSY..."	Slow	1
OG5_127106	PF3D7_1108500	succinyl-CoA synthetase alpha subunit, putative	(275-277)	1	... VDNGKRKKKPVFAFIAGKCA<span class=\motif\">PPG</span>KRMGHAGALISGGKGTADGK..."	1	1.366	Mutable in CDS		PBANKA_0938500	succinyl-CoA synthetase alpha subunit, putative	(277-279)	1	... DPEKKKKKKNIFAFIAGRCA<span class=\motif\">PPG</span>KRMGHAGALISGGKGTADGK..."	Slow	1
OG5_139388	PF3D7_1212900	bromodomain protein 2, putative	(794-796)	1	... NSNTLDDDDFEPPNVGTIPE<span class=\motif\">PPG</span>IQKIGINDKGLNNYQVNLLF..."	0.173	-2.746	Non - Mutable in CDS		PBANKA_1428900	bromodomain protein 2, putative	(688-690)	1	... CYNNSNSIDFEPPSMGTIPE<span class=\motif\">PPG</span>IQKIGINDKGLNNYQVNLLF..."	Slow	1
OG5_127099	PF3D7_1235700	ATP synthase subunit beta, mitochondrial	(282-284)	1	... NNEFDFNGSKAALVYGQMNE<span class=\motif\">PPG</span>ARARVALTGLTVAEYFRDEE..."	0.622	-2.512	Non - Mutable in CDS		PBANKA_1450300	ATP synthase subunit beta, mitochondrial	(281-283)	1	... DNEYDFSGSKAALVYGQMNE<span class=\motif\">PPG</span>ARARVALTGLTVAEYFRDEE..."	Slow	1
OG5_165233	PF3D7_1306000	conserved Plasmodium protein, unknown function	(126-128)	1	... SSTLKNIKDITHMNDSFPIN<span class=\motif\">PPG</span>KKKKKKEKCTLLNKIINKDK..."	0.999	-2.89	Mutable in CDS		PBANKA_1404500	conserved Plasmodium protein, unknown function	(126-128)	1	... RYKRHEPHGTGDKSPTSNDS<span class=\motif\">PPP</span>QETPSEASSPSSSTEQTKTP..."	Slow	1
OG5_128313	PF3D7_1405800	ribosome biogenesis protein BOP1, putative	(355-357)	1	... NNINEISLPHILPGHKYSYN<span class=\motif\">PPP</span>ELMLSSSEKRKLLKNNKDAF..."	0.643	-2.42	Non - Mutable in CDS		PBANKA_1036400	ribosome biogenesis protein BOP1, putative	(310-312), (498-500)	2	... SNMNEINLPNILPGHKYSYN<span class=\motif\">PPP</span>ELIYTASDEKHILKNNKDAF... SLLAISWGNVIILIQYESYV<span class=\"motif\">PPP</span>KSNTKDVEQIYYDKKRRKND..."	Slow	1
OG5_126892	PF3D7_1435300	NAD(P)H-dependent glutamate synthase, putative	(1273-1275)	1	... KVSSKIASIRRSTPGVGLIS<span class=\motif\">PPP</span>HHDMYSIEDVGQLVYDLKNI..."	1	-0.382	Mutable in CDS		PBANKA_1009500	NAD(P)H-dependent glutamate synthase, putative	(1284-1286)	1	... KVNAKIASVRRSTPGIGLIS<span class=\motif\">PPP</span>HHDMYSIEDVGQLVYDLKNI..."	Slow	1
OG5_167010	PF3D7_0208900	6-cysteine protein	(440-442)	1	... RFKSYNNKIVGIKLENSILD<span class=\motif\">PPG</span>CFKTVYEDDKILQLEVFLQY..."	1	-1.524	Mutable in CDS		PBANKA_0306000	6-cysteine protein	null	0	null	Dispensable	2
OG5_141937	PF3D7_0511500	RNA pseudouridylate synthase, putative	(6891-6893)	1	... SKLRRLSDQPLSAKSSKIVT<span class=\motif\">PPG</span>NNMNNNTNNVINNTNNVPNN..."	1	-1.927	Mutable in CDS		PBANKA_1111000	RNA pseudouridylate synthase, putative	null	0	null	Dispensable	2
OG5_166986	PF3D7_0612800	6-cysteine protein	(316-318)	1	... HQDKNKRITFASFTLNINEN<span class=\motif\">PPG</span>FTCYCIKDQTNINNPLIVNF..."	1	1.326	Mutable in CDS		PBANKA_0111100	6-cysteine protein	null	0	null	Dispensable	2
OG5_147639	PF3D7_0621400	Pf77 protein	(230-232)	1	... KYQDVPVCKYVPKIDVELDC<span class=\motif\">PPP</span>LIVPYPAVHFHNTSEVMNPH..."	1	-1.829	Mutable in CDS		PBANKA_1120400	inner membrane complex protein 1j, putative	null	0	null	Dispensable	2
OG5_167182	PF3D7_1134300	conserved Plasmodium protein, unknown function	(772-774)	1	... DRNITNGNNNYLVEYNNSCI<span class=\motif\">PPP</span>LKKMIPIDGVRNKSINKLNN..."	1	-1.442	Mutable in CDS		PBANKA_0914100	conserved Plasmodium protein, unknown function	null	0	null	Dispensable	2
OG5_149953	PF3D7_0307700	conserved Plasmodium protein, unknown function	(1449-1451)	1	... QPLGQQVGQPLGQAINYQVI<span class=\motif\">PPP</span>QTIGQQLAEPINQQLNHQLS..."	0.776	-2.472	Non - Mutable in CDS		PBANKA_0406000	conserved Plasmodium protein, unknown function	null	0	null	Essential	2
OG5_160576	PF3D7_0308100	zinc finger protein, putative	(1669-1671)	1	... EQVERKIRKYKIQMDQENKK<span class=\motif\">PPP</span>SKNKINMKSINLDIDDDQNV..."	1	0.095	Mutable in CDS		PBANKA_0406400	zinc finger protein, putative	null	0	null	Essential	2
OG5_126895	PF3D7_0505500	DNA mismatch repair protein MSH6, putative	(390-392)	1	... RDINLRTPDHADYDSSTIWT<span class=\motif\">PPP</span>DHKWAIEYKQAHYTPGMQQF..."	0.696	-2.407	Non - Mutable in CDS		PBANKA_1105100	DNA mismatch repair protein MSH6, putative	null	0	null	Essential	2
OG5_165482	PF3D7_0514200	conserved Plasmodium protein, unknown function	(496-498)	1	... FKEKGFNLQEYYNEIYRCSL<span class=\motif\">PPP</span>SLNKGMLDKKMNHHKNEQKM..."	0.981	-2.411	Mutable in CDS		PBANKA_1113900	conserved Plasmodium protein, unknown function	null	0	null	Essential	2
OG5_130975	PF3D7_0515000	pre-mRNA-splicing factor CWC2, putative	(308-310), (334-336), (342-344)	3	... TNDDKNCKKIEPPSQILLNT<span class=\motif\">PPP</span>PSGQPPTGIQNVSHNSPPVPPTC<span class=\"motif\">PPP</span>PTPPA<span class=\"motif\">PPG</span>QPTQSNYPSQYYNMYNNMSV..."	1	-2.274	Mutable in CDS		PBANKA_1114600	pre-mRNA-splicing factor CWC2, putative	null	0	null	Essential	2
OG5_128022	PF3D7_0619900	splicing factor 3A subunit 2, putative	(214-216)	1	... YKWFDKKKIFVMQIHFQNAF<span class=\motif\">PPG</span>HVNLREHSNFLSSTNRW"	1	0.872	Mutable in CDS		PBANKA_1119100	splicing factor 3A subunit 2, putative	null	0	null	Essential	2
OG5_165487	PF3D7_0817600	conserved Plasmodium protein, unknown function	(432-434)	1	... DKKTCVQNGIHNNGYVCKGV<span class=\motif\">PPP</span>FYEYPYMMNYPYCNNVLYNG..."	0.418	-2.556	Non - Mutable in CDS		PBANKA_0713200	conserved Plasmodium protein, unknown function	null	0	null	Essential	2
OG5_159573	PF3D7_0930300	merozoite surface protein 1	(343-345)	1	... TLKKNENIKKLLDKINEIKN<span class=\motif\">PPP</span>ANSGNTPNTLLDKNKKIEEH..."	0.141	-3.197	Non - Mutable in CDS		PBANKA_0831000	merozoite surface protein 1	null	0	null	Essential	2
OG5_150071	PF3D7_1004200	WD repeat-containing protein, putative	(1686-1688)	1	... KDPQNDYIFNKNKGSNVNYL<span class=\motif\">PPP</span>LSPSYMSPSYMSSSYMSSSY..."	0.193	-2.75	Non - Mutable in CDS		PBANKA_1202500	WD repeat-containing protein, putative	null	0	null	Essential	2
OG5_128613	PF3D7_1110200	pre-mRNA-processing factor 6, putative	(37-39)	1	MDLTSLKNEMTKNIKNDVFKNMSINNNKVKYEPFGK<span class=\motif\">PPP</span>GYIPGKGRGVTGFSGGVSRD..."	0.871	-2.907	Mutable in CDS		PBANKA_0937400	pre-mRNA-processing factor 6, putative	null	0	null	Essential	2
OG5_137922	PF3D7_1248700	conserved Plasmodium protein, unknown function	(1424-1426)	1	... GSKMGNMNNIGGYNFPYMCT<span class=\motif\">PPP</span>MYNQYYMYNGNNMYLPNGGP..."	0.314	-2.674	Non - Mutable in CDS		PBANKA_1461600	conserved Plasmodium protein, unknown function	null	0	null	Essential	2
OG5_160667	PF3D7_1326600	conserved Plasmodium protein, unknown function	(1279-1281)	1	... KYDSNPPSSQALSTDPPSSN<span class=\motif\">PPG</span>SNAYSIDPQNNNPYSNNLYS..."	0.971	-2.787	Mutable in CDS		PBANKA_1341800	conserved Plasmodium protein, unknown function	null	0	null	Essential	2
OG5_147637	PF3D7_1329500	conserved Plasmodium protein, unknown function	(1729-1731), (1754-1756)	2	... DFMPRNSYNNMDKKSKNNGM<span class=\motif\">PPP</span>PPDLMNSNNKMMPYNFNNFSKG<span class=\"motif\">PPG</span>GVVGAPDLSNMSNMNNRLMY..."	0.283	-2.663	Non - Mutable in CDS		PBANKA_1344500	conserved Plasmodium protein, unknown function	null	0	null	Essential	2
OG5_156157	PF3D7_1336600	conserved Plasmodium protein, unknown function	(43-45)	1	... VPLLGVDCNANPRHKQVLSN<span class=\motif\">PPP</span>RSRGIPKYLEKYIFYKQAPR..."	1	-1.247	Non - Mutable in CDS		PBANKA_1350400	conserved Plasmodium protein, unknown function	null	0	null	Essential	2
OG5_166430	PF3D7_1366900	conserved Plasmodium protein, unknown function	(256-258)	1	... KGKHMVGFTCFLKRGTQNPV<span class=\motif\">PPP</span>PAPPLTNNQGENNIPTDNRN..."	1	-2.329	Mutable in CDS		PBANKA_1142800	conserved Plasmodium protein, unknown function	null	0	null	Essential	2
OG5_134232	PF3D7_1409100	aldo-keto reductase, putative	(485-487)	1	... KNHVLYEKRPDIDKLKFGDK<span class=\motif\">PPP</span>GSEDLMNTILKNVNEDHNKN..."	0.15	-2.791	Non - Mutable in CDS		PBANKA_1033400	aldo-keto reductase, putative	null	0	null	Essential	2
OG5_139221	PF3D7_1464000	YL1 nuclear protein, putative	(451-453)	1	... NNHEENINSQKKNSSMSINI<span class=\motif\">PPP</span>IIPDNKEKQINNDKNTILSN..."	0.155	-2.911	Non - Mutable in CDS		PBANKA_1327400	YL1 nuclear protein, putative	null	0	null	Essential	2
OG5_129463	PF3D7_1107300	polyadenylate-binding protein-interacting protein 1, putative	(748-750)	1	... QKSPSLSINPYNFLSCSLPT<span class=\motif\">PPP</span>QLPHTGPLSMTSLDPHFMST..."	1	-2.463	Mutable in CDS		PBANKA_0939600	polyadenylate-binding protein-interacting protein 1, putative	null	0	null	Essential	2
OG5_138427	PF3D7_0315200	circumsporozoite- and TRAP-related protein	(69-71), (763-765)	2	... KKLTNKSFLQVQHTVATRSV<span class=\motif\">PPP</span>PCLGDDCFCQNYYDLTLILD... LLKNVSEVFVKKICDNGVVL<span class=\"motif\">PPG</span>SPSESTPGSPSESTPGSPSE..."	1	0.068	Mutable in CDS		PBANKA_0412900	circumsporozoite- and TRAP-related protein	null	0	null	no data	2
OG5_128443	PF3D7_0528200	eukaryotic translation initiation factor 3 subunit E, putative	(442-444)	1	... RNAKLDAKINSEKNCIEIST<span class=\motif\">PPP</span>NLYQQVIDKTQNLIMRSNFI..."	0.128	-3.124	Non - Mutable in CDS		PBANKA_1242800	eukaryotic translation initiation factor 3 subunit E, putative	null	0	null	no data	2
OG5_156801	PF3D7_0530800	CPW-WPC family protein	(80-82)	1	... DNVPPNVDIAGDLLKVMKHI<span class=\motif\">PPP</span>VVELNENELIDPEIVCERDY..."	1	1.343	Mutable in CDS		PBANKA_1245200	CPW-WPC family protein	null	0	null	no data	2
OG5_153848	PF3D7_0609000	conserved Plasmodium protein, unknown function	(4354-4356)	1	... QNVYNYSNIEHIHYIKNETN<span class=\motif\">PPP</span>CSNNNNNINKYNNNNNNNVH..."	0.774	-3.061	Mutable in CDS		PBANKA_0107600	conserved Plasmodium protein, unknown function	null	0	null	no data	2
OG5_166171	PF3D7_0620400	merozoite surface protein 10	(313-315)	1	... EILSTDSNTSHLKERKNQKA<span class=\motif\">PPG</span>EHKPEVKNALLNSQVASPKG..."	0.347	-2.675	Non - Mutable in CDS		PBANKA_1119600	merozoite surface protein 10, putative	null	0	null	no data	2
OG5_167094	PF3D7_0724600	protein kinase, putative	(1637-1639)	1	... RKKDCIESTLTNLYTNNCDV<span class=\motif\">PPG</span>KDGTKLIKRNINDGNYMNDD..."	1	-1.997	Mutable in CDS		PBANKA_0622100	protein kinase, putative	null	0	null	no data	2
OG5_140536	PF3D7_0828300	conserved Plasmodium protein, unknown function	(424-426)	1	... NKEKLVAQLLIRWWYVLPDW<span class=\motif\">PPP</span>DYDYKDELYNRKLKLVPLEE..."	0.912	-2.558	Mutable in CDS		PBANKA_0702400	conserved Plasmodium protein, unknown function	null	0	null	no data	2
OG5_167150	PF3D7_0918700	conserved Plasmodium protein, unknown function	(642-644)	1	... KICNDETTQMLNAFVPFDLD<span class=\motif\">PPP</span>LYAENPETVSPLTPISEIID..."	1	-2.728	Mutable in CDS		PBANKA_0819600	conserved Plasmodium protein, unknown function	null	0	null	no data	2
OG5_167164	PF3D7_0933700	conserved Plasmodium protein, unknown function	(19-21)	1	MSDNFFIPTFEHIYEQSI<span class=\motif\">PPP</span>LIKHSRKCKNYNKKRKNIIK..."	0.159	-2.805	Non - Mutable in CDS		PBANKA_0834500	conserved Plasmodium protein, unknown function	null	0	null	no data	2
OG5_156823	PF3D7_1008100	zinc finger protein, putative	(2141-2143), (2998-3000)	2	... KDINKNGVPNIQVEIKRRGR<span class=\motif\">PPG</span>STKLSKLLLQNNFPIKSDNI... KNPFRVKRVGRPSKYRPPIE<span class=\"motif\">PPP</span>NPDNINSNNNNNNNNNNNND..."	0.825	-2.082	Mutable in CDS		PBANKA_1206300	zinc finger protein, putative	null	0	null	no data	2
OG5_167036	PF3D7_1018700	conserved Plasmodium protein, unknown function	(194-196)	1	... NPNIFKKQTNYYYDEEDQKH<span class=\motif\">PPG</span>YLNQKQHIIDIRKKDITYTK..."	1	-0.158	Mutable in CDS		PBANKA_0502900	conserved Plasmodium protein, unknown function	null	0	null	no data	2
OG5_160663	PF3D7_1117400	conserved Plasmodium protein, unknown function	(312-314)	1	... GAPIGSPNIMSQGMVGGVAT<span class=\motif\">PPG</span>VQVPNNAIPFNPMNPTNLMP..."	0.161	-2.944	Non - Mutable in CDS		PBANKA_0930600	conserved Plasmodium protein, unknown function	null	0	null	no data	2
OG5_160914	PF3D7_1119900	conserved Plasmodium protein, unknown function	(1719-1721)	1	... EEKEREKQKLEKQMAMKNIS<span class=\motif\">PPP</span>TGINYSSERNKNPLNMTDVR..."	1	-0.099	Mutable in CDS		PBANKA_0928300	conserved Plasmodium protein, unknown function	null	0	null	no data	2
OG5_157155	PF3D7_1122500	conserved Plasmodium protein, unknown function	(336-338)	1	... YEKLDGLSFCYDNDSKNFNF<span class=\motif\">PPG</span>QDDHDKSIQLQKDHKTGILY..."	0.125	-2.929	Non - Mutable in CDS		PBANKA_0925800	conserved Plasmodium protein, unknown function	null	0	null	no data	2
OG5_165562	PF3D7_1206300	conserved Plasmodium protein, unknown function	(271-273), (536-538)	2	... YIPENKEKILNDIKTKPNMA<span class=\motif\">PPP</span>NRRKSIIGGVRENMDMYDNN... IKDIRNYHKMNSLMRNENKM<span class=\"motif\">PPP</span>KKIVQNKGQTKKVDEMDTSK..."	0.599	-2.564	Non - Mutable in CDS		PBANKA_0604900	conserved Plasmodium protein, unknown function	null	0	null	no data	2
OG5_128816	PF3D7_1243100	zinc finger protein, putative	(72-74)	1	... DEDELILKLLPDLKKKSKLE<span class=\motif\">PPP</span>PSERKLLEERKENLLLEKNL..."	0.253	-2.657	Non - Mutable in CDS		PBANKA_1456500	zinc finger protein, putative	null	0	null	no data	2
OG5_157030	PF3D7_1342900	AP2 domain transcription factor, putative	(2516-2518)	1	... DNVKDNEKNTKEIKIIKNKI<span class=\motif\">PPP</span>KKKTVQNIRTNEKCNEEKEI..."	1	-1.975	Mutable in CDS		PBANKA_1356000	AP2 domain transcription factor, putative	null	0	null	no data	2
OG5_128311	PF3D7_1363200	bifunctional polynucleotide phosphatase/kinase	(308-310)	1	... TTNEKYIPPNDQQKLIILIG<span class=\motif\">PPG</span>CGKTFLCTNYFSTYIRINME..."	1	-0.753	Mutable in CDS		PBANKA_1139200	bifunctional polynucleotide phosphatase/kinase, putative	null	0	null	no data	2
OG5_127442	PF3D7_1414800	small nuclear ribonucleoprotein-associated protein B, putative	(184-186)	1	... ISMQINQNPPHNNANQAKGL<span class=\motif\">PPG</span>VPQLPFPPNVNPPAE"	0.122	-3.272	Non - Mutable in CDS		PBANKA_1027900	small nuclear ribonucleoprotein-associated protein B, putative	null	0	null	no data	2
OG5_128997	PF3D7_1416100	protein SEY1, putative	(928-930)	1	... IFYMAKNSYNFFKHIQAISN<span class=\motif\">PPP</span>KNVQKQE"	0.143	-3.264	Non - Mutable in CDS		PBANKA_1026600	protein SEY1, putative	null	0	null	no data	2
OG5_155007	PF3D7_0111800	eukaryotic translation initiation factor 4E, putative	(463-465)	1	... AEFVASKKDSLKMHNYPNIV<span class=\motif\">PPP</span>NYLGNYNVYKYNLDMNLFYL..."	1	0.607	Mutable in CDS		PBANKA_0202000	eukaryotic translation initiation factor 4E, putative	null	0	null	no data	2
OG5_166991	PF3D7_0108700	secreted ookinete protein, putative	(1118-1120)	1	... NISKAGDPFLHNQEGSFSYA<span class=\motif\">PPP</span>YQGVENSSNKNQKYLTQRKE..."	1	0.113	Mutable in CDS		PBANKA_0204800	secreted ookinete protein, putative	null	0	null	no data	2
OG5_132022	PF3D7_0203900	5'-3' exonuclease, N-terminal resolvase-like domain, putative	(250-252)	1	... TLKEKKQKDFSFVNNHQEKE<span class=\motif\">PPP</span>MYTYMKNNVYDNAGSIGTNK..."	0.315	-2.642	Non - Mutable in CDS		PBANKA_0301700	5'-3' exonuclease, putative	null	0	null	Slow	2
OG5_128180	PF3D7_0309300	N2227-like protein, putative	(677-679)	1	... ENMPNDNICARENNSKYEHT<span class=\motif\">PPG</span>MRISQAYTPTLDDYNLIQNM..."	1	-0.694	Mutable in CDS		PBANKA_0407500	N2227-like protein, putative	null	0	null	Slow	2
OG5_144279	PF3D7_0623300	EGF-like membrane protein, putative	(170-172)	1	... TQKDMQSATMLNWGNEKVEV<span class=\motif\">PPP</span>CDQQIRKGLSKYVIYHTPVT..."	0.935	-2.235	Non - Mutable in CDS		PBANKA_1122200	EGF-like membrane protein, putative	null	0	null	Slow	2
OG5_127284	PF3D7_0911700	GTP-binding protein, putative	(406-408)	1	... ISAKYGKNVKMLFQRIISDI<span class=\motif\">PPP</span>INTINSFFRGVVFDSFFDQY..."	0.845	-2.886	Mutable in CDS		PBANKA_0812800	GTP-binding protein, putative	null	0	null	Slow	2
OG5_133188	PF3D7_1138400	guanylyl cyclase	(2680-2682)	1	... MADMKNCLNPLKNTFLVDLL<span class=\motif\">PPG</span>KRFRINEDHIYFKNNERMEN..."	0.954	-2.882	Mutable in CDS		PBANKA_0910300	guanylyl cyclase, putative	null	0	null	Slow	2
OG5_128231	PF3D7_1420000	splicing factor 3B subunit 4, putative	(429-431), (449-451)	2	... PPNFPPTLPPNFPPTLPPNF<span class=\motif\">PPG</span>FPPNLPPNFPPTLPPNI<span class=\"motif\">PPG</span>FPPNIPPNLPPNIPSYSENN..."	0.728	-2.338	Non - Mutable in CDS		PBANKA_1023200	splicing factor 3B subunit 4, putative	null	0	null	Slow	2
OG5_128193	PF3D7_0100100	erythrocyte membrane protein 1, PfEMP1	(763-765), (788-790), (1678-1680), (1681-1683), (1715-1717), (1877-1879)	6	... MDKLLNREENDATECKKCDK<span class=\motif\">PPP</span>APTAGDRGPGARADPHDVQQPR<span class=\"motif\">PPG</span>SGPGTDANDEDDDDDDDDDD... PTTAEETSPTATSEGTENQS<span class=\"motif\">PPP</span><span class=\"motif\">PPP</span>APAPAPAPAPEKSQPKEDKKVEPQPKPQPTN<span class=\"motif\">PPP</span>NLFNNPAVIPALMSSTIMWS... TASGKNTPSDTQNDIPTSDT<span class=\"motif\">PPP</span>ITDNEWNTLKDEFISQYLQS..."	1	-1.706	Mutable in CDS		no ortholog	null	null	null	null	null	3
OG5_143975	PF3D7_0101300	Pfmc-2TM Maurer's cleft two transmembrane protein	(186-188)	1	... STTLLLIIIMIACVYWLAST<span class=\motif\">PPP</span>GLFCLPFIVLIFIIYIVARY..."	1	-1.492	Mutable in CDS		no ortholog	null	null	null	null	null	3
OG5_132467	PF3D7_0207400	serine repeat antigen 7	(26-28)	1	MVYRLFIILVLYVICCTNVIVGQEK<span class=\motif\">PPP</span>DSTVGANPGDERESSGRVNN..."	1	-1.186	Mutable in CDS		no ortholog	null	null	null	null	null	3
OG5_132467	PF3D7_0207700	serine repeat antigen 4	(40-42)	1	MKIHIFLIATIYVLFSEKLIKWTTASTTQGGDTDTHPGT<span class=\motif\">PPG</span>EGSDVSQGAGQDASQGAGQD..."	1	0.947	Mutable in CDS		no ortholog	null	null	null	null	null	3
OG5_128193	PF3D7_0223500	erythrocyte membrane protein 1, PfEMP1	(833-835)	1	... DDANNCLKTHKEKCEETQPK<span class=\motif\">PPG</span>AGGPGAPSETGETTTLEDEE..."	null	null	null		no ortholog	null	null	null	null	null	3
OG5_128193	PF3D7_0300100	erythrocyte membrane protein 1, PfEMP1	(1701-1703), (1720-1722), (1915-1917)	3	... SRSEEEEEVSGSGDQGSPPA<span class=\motif\">PPP</span>PESPQEKAPAPAPEEL<span class=\"motif\">PPG</span>PERPPKPAAPTSTPEVPAQP... GIPSDTPNTPSDIPKTPSDT<span class=\"motif\">PPP</span>ITDDEWNTLKDEFISQYLQS..."	1	0.144	Mutable in CDS		no ortholog	null	null	null	null	null	3
OG5_126825	PF3D7_0324800	rifin	(247-249)	1	... YRDAQLISGAIYKQFEMTCM<span class=\motif\">PPG</span>ALPNLSNPICISMWSKFVST..."	1	-2.954	Mutable in CDS		no ortholog	null	null	null	null	null	3
OG5_128193	PF3D7_0324900	erythrocyte membrane protein 1, PfEMP1	(752-754), (1084-1086), (1704-1706)	3	... PEDTCPTSDTGSRARSDHHD<span class=\motif\">PPP</span>VIPRNDFEDEKDKQPEFKDP... QISEKIKNVIEKSGDTPSRT<span class=\"motif\">PPG</span>QQPSDNDPKSWWKLHAPYIW... EKPAAETKAKEEKPAQDEAG<span class=\"motif\">PPP</span>ADPLPAREPFDPTILQTTIP..."	null	null	null		no ortholog	null	null	null	null	null	3
OG5_128193	PF3D7_0400100	erythrocyte membrane protein 1, PfEMP1	(1233-1235), (1237-1239), (2134-2136)	3	... YSEKCNCLGAKFVPTNVPPA<span class=\motif\">PPP</span>Q<span class=\"motif\">PPP</span>PPAIPAPATTPGVNPCEIVN... KTEDEESKKKKDESTPDSPE<span class=\"motif\">PPP</span>PATPEAPKEEKKVEPQPQPQ..."	1	-0.358	Mutable in CDS		no ortholog	null	null	null	null	null	3
OG5_128193	PF3D7_0400400	erythrocyte membrane protein 1, PfEMP1	(1560-1562), (1952-1954), (1975-1977), (2349-2351), (2880-2882), (2990-2992)	6	... KPNKTYTNSDLEKKCECKPQ<span class=\motif\">PPP</span>PAPAPTQSACEIVDDILNGK... TKSQASSRNFSVRSEDGEDG<span class=\"motif\">PPP</span>PRAPRQSLARSADNPSPRPA<span class=\"motif\">PPG</span>GPQPPSGTPDAGGARAETGP... AKEEKIKETIDKVFPNSVST<span class=\"motif\">PPP</span>TPATKPSDEKRKTWWEANGE... KDMVTLLLSRLQNEIKTCQN<span class=\"motif\">PPP</span>SDANLLSAQNPAQCQESSPV... GDEEQSGAPSSPSPSEGTEE<span class=\"motif\…	0.977	-2.248	Non - Mutable in CDS		no ortholog	null	null	null	null	null	3
OG5_128193	PF3D7_0402800	erythrocyte membrane protein 1 (PfEMP1), pseudogene	(901-903)	1	... NSPDQTTQRDDGDEPPLPDG<span class=\motif\">PPG</span>KVPATDQITNALLGSAIPLG..."	1	-2.199	Mutable in CDS		no ortholog	null	null	null	null	null	3
OG5_128193	PF3D7_0412700	erythrocyte membrane protein 1, PfEMP1	(823-825), (1707-1709), (1774-1776), (1953-1955)	4	... KLLEQELKDANRCKNCEQRK<span class=\motif\">PPG</span>EEGGAARNLPGVDTTVDDAN... KKAEKCHDQHSDNPQEKCDE<span class=\"motif\">PPP</span>ELDEEDLLLEEEQNPKNMRP... VKKEEEEKEEQEEEEPDEKV<span class=\"motif\">PPP</span>RAPEASKPKKEKPSQPPRPR... PSGNNTPTSDIPSDIPNSDT<span class=\"motif\">PPP</span>ITDDEWNQLKKDFISNMLQN..."	1	1.497	Mutable in CDS		no ortholog	null	null	null	null	null	3
OG5_128193	PF3D7_0420700	erythrocyte membrane protein 1, PfEMP1	(3-5), (725-727), (1666-1668)	3	MV<span class=\motif\">PPG</span>GRQGGSGEDGIDDKDAKHLL... QKKKKEWGKIIEHFYKQEGI<span class=\"motif\">PPG</span>THDITLEGVLKKEVLLTSLQ... DNSEQEETSKEVVPEKKMPT<span class=\"motif\">PPP</span>KKPEQGPKQRKKQKRQLPTH..."	1	-1.925	Mutable in CDS		no ortholog	null	null	null	null	null	3
OG5_128193	PF3D7_0420900	erythrocyte membrane protein 1, PfEMP1	(3-5), (725-727), (1716-1718)	3	MV<span class=\motif\">PPG</span>GRQGGSGEDGIDDKDAKHLL... QKKKKEWGKIIEHFYKQEGI<span class=\"motif\">PPG</span>THDITLEGVLKKEVLLTSLQ... SEDTTAAEGEENGAPGSSGT<span class=\"motif\">PPP</span>PPAAPPSTPAKTKESKKPKS..."	0.99	-2.016	Non - Mutable in CDS		no ortholog	null	null	null	null	null	3
OG5_128193	PF3D7_0421100	erythrocyte membrane protein 1, PfEMP1	(1696-1698)	1	... SEDTTAAEGEENGAPGSSGT<span class=\motif\">PPP</span>PPAAPPSTPAKTKESKKPKS..."	0.978	-2.103	Non - Mutable in CDS		no ortholog	null	null	null	null	null	3
OG5_128193	PF3D7_0421300	erythrocyte membrane protein 1, PfEMP1	(1727-1729)	1	... DKGTKELPLTPRPRPGPQPK<span class=\motif\">PPP</span>QVEKNPWEHPIVIPALVTST..."	1	-1.121	Mutable in CDS		no ortholog	null	null	null	null	null	3
OG5_167067	PF3D7_0423400	apical asparagine-rich protein AARP	(179-181), (182-184), (186-188), (189-191)	4	... DNNNNNNDNNNNSSAAFTAL<span class=\motif\">PPP</span><span class=\"motif\">PPP</span>V<span class=\"motif\">PPP</span><span class=\"motif\">PPP</span>TLTPSGIVGNVLSTFVSHGL..."	0.519	0	Non - Mutable in CDS		no ortholog	null	null	null	null	null	3
OG5_128193	PF3D7_0425800	erythrocyte membrane protein 1, PfEMP1	(742-744), (1147-1149), (1227-1229), (2104-2106), (2137-2139)	5	... NNSKDSCPPSVDTKTNPCAK<span class=\motif\">PPG</span>SKPTKSVKQLAEHMQQKAQK... DRSVYDFLYELHLQNGGKKG<span class=\"motif\">PPP</span>ATHPYKSVNTRDKRDATDDT... AFKNPPNVYVEACKCMTREA<span class=\"motif\">PPP</span>PTTPSTPNPCAETGGVHTIK... EVNGKCNCKVKHRPQPPLAL<span class=\"motif\">PPP</span>APSGPPAEDQIEHDNRGRSERGDQGPLPAR<span class=\"motif\">PPP</span>PPQAAQPPQPKPKRTGEGLG..."	1	-1.972	Mutable in CDS		no ortholog	null	null	null	null	null	3
OG5_128193	PF3D7_0426000	erythrocyte membrane protein 1, PfEMP1	(1594-1596)	1	... DTSTTSVVPEFCEQFVKPEA<span class=\motif\">PPP</span>KVPEIPKEEDKDKRDEEKPA..."	null	null	null		no ortholog	null	null	null	null	null	3
OG5_128193	PF3D7_0500100	erythrocyte membrane protein 1, PfEMP1	(3-5), (1676-1678), (1727-1729)	3	MG<span class=\motif\">PPG</span>ITGTQGETAKHMFDRIGKQV... EENENQVENQKVGNKAPAFC<span class=\"motif\">PPP</span>EKPPKEEPDEKCGDKEEEKE... NEEQSGAPSSPSPSEGTKEL<span class=\"motif\">PPP</span>PEPPEEAKPPEPVKPTPAPA..."	1	-1.546	Mutable in CDS		no ortholog	null	null	null	null	null	3
OG5_126825	PF3D7_0500300	rifin, pseudogene	(221-223)	1	... QLATVILRRRDAVCSATGLT<span class=\motif\">PPG</span>DTCNRISISIGTKLPNGQYA..."	0.271	-2.525	Non - Mutable in CDS		no ortholog	null	null	null	null	null	3
OG5_128193	PF3D7_0600200	erythrocyte membrane protein 1, PfEMP1	(2431-2433)	1	... KEILDETSSKPKEEDTSHVQ<span class=\motif\">PPP</span>LPPKPSTPEVEPLPSDEPFD..."	1	-0.779	Mutable in CDS		no ortholog	null	null	null	null	null	3
OG5_128193	PF3D7_0617400	erythrocyte membrane protein 1, PfEMP1	(1983-1985)	1	... GCEPASPLEPEEVEEETASV<span class=\motif\">PPG</span>SEPEADKGPVKPAELPKPPK..."	1	-0.531	Mutable in CDS		no ortholog	null	null	null	null	null	3
OG5_158546	PF3D7_0627100	ankyrin-repeat protein, putative	(1232-1234)	1	... NNSGNNSGNNSGNNNSNNNM<span class=\motif\">PPG</span>YNNDKPEDLKKSFSSEKYSS..."	0.143	-3.205	Non - Mutable in CDS		no ortholog	null	null	null	null	null	3
OG5_126825	PF3D7_0632200	rifin	(281-283)	1	... KQFDYTFGMRIRLGSPVEYG<span class=\motif\">PPP</span>ASAIPDTVKKVVAGAEQAAE..."	0.794	-2.092	Non - Mutable in CDS		no ortholog	null	null	null	null	null	3
OG5_128193	PF3D7_0632500	erythrocyte membrane protein 1, PfEMP1	(3-5)	1	MG<span class=\motif\">PPG</span>GSGGSTLDESVKDLFDRIGK..."	1	-1.051	Mutable in CDS		no ortholog	null	null	null	null	null	3
OG5_128193	PF3D7_0632800	erythrocyte membrane protein 1, PfEMP1	(1699-1701), (1923-1925)	2	... QTAPKKPAADSERQTPEEKL<span class=\motif\">PPP</span>PAAKEEKPPKQNAEKTKPKR... GIPSDTPNTPSDIPKTPSDT<span class=\"motif\">PPP</span>ITDDEWNTLKDDFISNMLQN..."	null	null	null		no ortholog	null	null	null	null	null	3
OG5_128193	PF3D7_0700100	erythrocyte membrane protein 1, PfEMP1	(825-827)	1	... GEAKKCLETHTSDTCPKPPK<span class=\motif\">PPP</span>STDKYAGRSDPPRVGPSRDP..."	1	-1.878	Mutable in CDS		no ortholog	null	null	null	null	null	3
OG5_128193	PF3D7_0711700	erythrocyte membrane protein 1, PfEMP1	(800-802), (811-813)	2	... KLLKHELTDAKDCQQKCDKK<span class=\motif\">PPP</span>PETPARNL<span class=\"motif\">PPP</span>DTQRDPNQEESEEEEEEEDE..."	1	-2.042	Mutable in CDS		no ortholog	null	null	null	null	null	3
OG5_128193	PF3D7_0712000	erythrocyte membrane protein 1, PfEMP1	(820-822), (1727-1729), (1951-1953)	3	... LIDYEEKEAQKCLEKRKQTC<span class=\motif\">PPP</span>EESPDRSQTPPASRSDSPRV... DEEDLLLVEDDKIIKQPGFC<span class=\"motif\">PPP</span>EEKTEIEGTDDKCEEASSPV... TQNDIHNDIPSDIPNTPSDT<span class=\"motif\">PPP</span>ITDDEWNQLKKDFISNMLQN..."	1	0.169	Mutable in CDS		no ortholog	null	null	null	null	null	3
OG5_128193	PF3D7_0712300	erythrocyte membrane protein 1, PfEMP1	(806-808), (1687-1689)	2	... ECKKCDEPKPEGAAGGRSDG<span class=\motif\">PPG</span>SPPRPAEKDEDHHSDESDEE... DDDEPFEEEENPENMRPGFC<span class=\"motif\">PPP</span>EEKTEIEGTDKKCEEAPTTP..."	1	-2.06	Mutable in CDS		no ortholog	null	null	null	null	null	3
OG5_128193	PF3D7_0712400	erythrocyte membrane protein 1, PfEMP1	(1596-1598)	1	... AFRTYPNDHQTKCDCKKKEA<span class=\motif\">PPP</span>EPPANVVPKVIPKSRTPREA..."	0.998	-2.015	Non - Mutable in CDS		no ortholog	null	null	null	null	null	3
OG5_128193	PF3D7_0712800	erythrocyte membrane protein 1, PfEMP1	(3-5), (746-748)	2	MA<span class=\motif\">PPG</span>GSVGAGSGGEEDAKHMFDRI... TPGGGDDARSDTSHDGARPQ<span class=\"motif\">PPP</span>ITNHHEEHDDDEDDDPNKIR..."	1	-0.884	Mutable in CDS		no ortholog	null	null	null	null	null	3
OG5_128193	PF3D7_0733000	erythrocyte membrane protein 1, PfEMP1	(831-833), (2068-2070)	2	... ECKKCEEQAARARSAETNDE<span class=\motif\">PPG</span>SPPRSEEVESEEEEEEEEED... EEENDQLPAPKEQTDPGSDT<span class=\"motif\">PPP</span>LPTPSKPDELLPIQADQPFD..."	null	null	null		no ortholog	null	null	null	null	null	3
OG5_128193	PF3D7_0800100	erythrocyte membrane protein 1, PfEMP1	(1630-1632), (1803-1805)	2	... VPAAETKDTENQPPQAPDVG<span class=\motif\">PPP</span>LAPAPADQPLDPTILQTTIP... TQNDIQNDIPSDIPKTPSDT<span class=\"motif\">PPP</span>ITDDEWNQLKDEFISQYLQS..."	1	-1.699	Mutable in CDS		no ortholog	null	null	null	null	null	3
OG5_128193	PF3D7_0800200	erythrocyte membrane protein 1, PfEMP1	(2426-2428), (2433-2435)	2	... DSPLKPHTEPKPAPPKKPEV<span class=\motif\">PPP</span>PPVQ<span class=\"motif\">PPP</span>ANQPFNRDILEKTIPFGIAL..."	1	-0.128	Mutable in CDS		no ortholog	null	null	null	null	null	3
OG5_128193	PF3D7_0800300	erythrocyte membrane protein 1, PfEMP1	(1608-1610), (2509-2511), (2513-2515)	3	... KALPPQEPPSTPESRGRSLN<span class=\motif\">PPP</span>DSPQPPRGPEEQEESASYSE... ENQPETPVIKPEEEAPAPEE<span class=\"motif\">PPP</span>A<span class=\"motif\">PPP</span>LAPSDESILHTTIPFGVALA..."	1	-2.056	Mutable in CDS		no ortholog	null	null	null	null	null	3
OG5_205011	PF3D7_0801000	Plasmodium exported protein (PHISTc), unknown function	(919-921)	1	... GYNFYNPHQHMVYGRPYYWV<span class=\motif\">PPP</span>PALEYTKGFNPMEQRREEDR..."	0.978	-3.004	Mutable in CDS		no ortholog	null	null	null	null	null	3
OG5_128193	PF3D7_0808600	erythrocyte membrane protein 1, PfEMP1	(732-734), (1734-1736), (1751-1753), (1919-1921)	4	... VQKKTEWENIKKHFKKQKDI<span class=\motif\">PPG</span>FTHDDVLEGVLEKEVLLTSI... KAEEEPAAEPEAVPEEEAPL<span class=\"motif\">PPP</span>PPAAPPRESKEKAK<span class=\"motif\">PPP</span>KPRIKTRHVLDHPAVIPALM... TASGKNTPSDTQNDIPTSDT<span class=\"motif\">PPP</span>ITDDEWNTLKHDFISQYLPN..."	0.999	-1.747	Non - Mutable in CDS		no ortholog	null	null	null	null	null	3
OG5_128193	PF3D7_0808700	erythrocyte membrane protein 1, PfEMP1	(782-784)	1	... MLEEELKDATKCKQDCEQRK<span class=\motif\">PPG</span>AGGGDVRSDTVPSRDPLTPG..."	1	-1.224	Mutable in CDS		no ortholog	null	null	null	null	null	3
OG5_128193	PF3D7_0833500	erythrocyte membrane protein 1, PfEMP1	(1024-1026), (1173-1175), (1746-1748)	3	... SVSPQVVGETPQVSTPALTS<span class=\motif\">PPP</span>SDPRADVDLVKAFVESAAVE... KISEKIEQILSKQSGTHPPT<span class=\"motif\">PPG</span>PPQTSVEKTTRESWWNAHAP... GCVPAEAPKEVVPEKKVPSD<span class=\"motif\">PPP</span>APAPAAPPSTPAAPKHPRGG..."	null	null	null		no ortholog	null	null	null	null	null	3
OG5_128193	PF3D7_0900800	erythrocyte membrane protein 1 (PfEMP1), exon 2, pseudogene	(398-400)	1	... DETYNIISTNNIYDHPSQET<span class=\motif\">PPP</span>TTWINKYYTQLYYHGQNNGL..."	1	-2.545	Mutable in CDS		no ortholog	null	null	null	null	null	3
OG5_205535	PF3D7_0907500	conserved Plasmodium protein, unknown function	(161-163)	1	... EGAKNNMDYNCIRQQANYTL<span class=\motif\">PPP</span>YEHF"	0.13	-2.893	Non - Mutable in CDS		no ortholog	null	null	null	null	null	3
OG5_128193	PF3D7_0937800	erythrocyte membrane protein 1, PfEMP1	(812-814), (1071-1073)	2	... IDYEKDEAKKCKDCQETQPQ<span class=\motif\">PPG</span>GDGVAKIGQPRSEVQPEEEE... LTGSGSDDPNDPNNIYSGKI<span class=\"motif\">PPP</span>FLRQMFYTLADYKDILFGDK..."	null	null	null		no ortholog	null	null	null	null	null	3
OG5_126825	PF3D7_1000200	rifin	(243-245)	1	... NTEYIFKAIFSKFNESCMPR<span class=\motif\">PPG</span>SVPGPVIDRAFCDTVDTLVL..."	0.565	-2.327	Non - Mutable in CDS		no ortholog	null	null	null	null	null	3
OG5_pfal|PF10_0024	PF3D7_1002000	Plasmodium exported protein (hyp2), unknown function	(420-422)	1	... EKGIKRKNYLFLILEKAKEI<span class=\motif\">PPG</span>VIVGLFSIFYVALGENRSSL..."	0.749	-2.735	Mutable in CDS		no ortholog	null	null	null	null	null	3
OG5_173153	PF3D7_1036000	merozoite surface protein 11	(181-183)	1	... VNLLTPSSPTQNDGSTGRNV<span class=\motif\">PPP</span>SEPNVDTPDPPTAPAPVKVP..."	0.391	-2.514	Non - Mutable in CDS		no ortholog	null	null	null	null	null	3
OG5_128193	PF3D7_1100100	erythrocyte membrane protein 1, PfEMP1	(1078-1080), (1728-1730)	2	... QQPVASSDDPQSKLQKSGDI<span class=\motif\">PPP</span>FLRQMFYTIADYKDILYSGS... TPKETASPADSGEGTKEHPS<span class=\"motif\">PPP</span>TPDPAAPTSPPLPPLTTALV..."	1	-1.565	Mutable in CDS		no ortholog	null	null	null	null	null	3
OG5_128193	PF3D7_1100200	erythrocyte membrane protein 1, PfEMP1	(750-752), (849-851), (1908-1910)	3	... GKLPKTLNDQDDEEDEEYEA<span class=\motif\">PPP</span>PTPPRTQKNPCVNGQNQKVR... ETAEEKKEEEKEEDTDGKVQ<span class=\"motif\">PPP</span>AATTPGVKPPCDIVEKHFKD... LPEPTDDPQTDSDTHDTPDI<span class=\"motif\">PPG</span>DVAPTFCNVPANPCGDKSAT..."	1	-2.315	Mutable in CDS		no ortholog	null	null	null	null	null	3
OG5_129626	PF3D7_1149600	DnaJ protein, putative	(559-561)	1	... KRVFRSIFNTMGMIARFVLN<span class=\motif\">PPP</span>FMLEGQYMNYNNMGQITNNE..."	1	-0.493	Mutable in CDS		no ortholog	null	null	null	null	null	3
OG5_128193	PF3D7_1150400	erythrocyte membrane protein 1, PfEMP1	(1116-1118), (1704-1706), (1707-1709), (1712-1714), (1715-1717), (1777-1779)	6	... DKPVVDFLYNLYLQNGGKKG<span class=\motif\">PPP</span>DTHRVKALIARVKRDAARNR... HPPHEYEVACKCETNKKPEA<span class=\"motif\">PPP</span><span class=\"motif\">PPP</span>PQ<span class=\"motif\">PPP</span><span class=\"motif\">PPP</span>QPARPAEDQIEHDHRARSDG... PPVQQPPAQPPQQPPQQPPQ<span class=\"motif\">PPP</span>PAPEGGGLGRSLPRADRNGE..."	null	null	null		no ortholog	null	null	null	null	null	3
OG5_128193	PF3D7_1200100	erythrocyte membrane protein 1, PfEMP1	(1608-1610)	1	... LEETEENTVEQPNICPQLPK<span class=\motif\">PPP</span>QPGDEDGCKQASPAPSEGTE..."	1	-2.01	Mutable in CDS		no ortholog	null	null	null	null	null	3
OG5_128193	PF3D7_1200400	erythrocyte membrane protein 1, PfEMP1	(1022-1024), (1215-1217), (2414-2416)	3	... WKAMTCENNGIKCDAHNAKH<span class=\motif\">PPP</span>DDYIPQRLRWMTEWSEWYCK... HGGTTPTGTNDTDAPYTFKQ<span class=\"motif\">PPP</span>EYKDACECDGKSPQAPKKEE... NPGRTCGPDTSHKSDTKPPL<span class=\"motif\">PPP</span>LPPAVDPPQAEEPFNRDILE..."	1	-1.803	Mutable in CDS		no ortholog	null	null	null	null	null	3
OG5_128193	PF3D7_1200600	erythrocyte membrane protein 1, PfEMP1	(70-72), (2635-2637)	2	... ICKITVNHSDSGTNDPCDRI<span class=\motif\">PPP</span>YGDNDQWKCAIILSKVSEKP... WKNPYETLDDTEVKNNCMCK<span class=\"motif\">PPP</span>PASNNTSDILQKTIPFGIAL..."	1	-1.899	Mutable in CDS		no ortholog	null	null	null	null	null	3
OG5_128193	PF3D7_1240200	erythrocyte membrane protein 1 (PfEMP1), pseudogene	(354-356)	1	... QHDTQSISSSSSSLSSSSSS<span class=\motif\">PPP</span>SQNLDTSRSNPSQVSPHGPD..."	0.953	-2.192	Non - Mutable in CDS		no ortholog	null	null	null	null	null	3
OG5_128193	PF3D7_1240300	erythrocyte membrane protein 1, PfEMP1	(1550-1552), (2074-2076), (2138-2140), (2147-2149), (2337-2339)	5	... QSSSGGVPSSSGHSSSSTVT<span class=\motif\">PPG</span>PPQTSGTTPKTWWQKNGEHI... IDECKTQHYPSGKPEEQCKE<span class=\"motif\">PPP</span>EDDYEDENEKKVESPTICPK... PKEDRQEEEESKKKKDETAL<span class=\"motif\">PPP</span>EPPADS<span class=\"motif\">PPP</span>AAPTKPLPSDNTSDILKTTI... GIPSDTPNTPSDIPKTPSDT<span class=\"motif\">PPP</span>ITDEEWNQLKHDFISNMLQN..."	1	-1.423	Mutable in CDS		no ortholog	null	null	null	null	null	3
OG5_128193	PF3D7_1240400	erythrocyte membrane protein 1, PfEMP1	(1750-1752)	1	... PAPAPAPAPAPSARPNHDQN<span class=\motif\">PPG</span>TGTRKITKRRQKSDKTKKTS..."	1	-2.332	Mutable in CDS		no ortholog	null	null	null	null	null	3
OG5_128193	PF3D7_1240600	erythrocyte membrane protein 1, PfEMP1	(1291-1293), (2038-2040)	2	... KEEKIKEAIQKFFEQTRGAI<span class=\motif\">PPP</span>PSGTTPSSWWEQHAESIWNG... DTQNDMPSDDIPSDIPNSDT<span class=\"motif\">PPP</span>ITDDEWNQLKKDFISNMLQN..."	1	-1.848	Non - Mutable in CDS		no ortholog	null	null	null	null	null	3
OG5_128193	PF3D7_1240900	erythrocyte membrane protein 1, PfEMP1	(1943-1945)	1	... RDTQNDIHNDIPSDIPNSDT<span class=\motif\">PPP</span>ITDDEWNKLKKDFISNMLQN..."	1	0.006	Mutable in CDS		no ortholog	null	null	null	null	null	3
OG5_128193	PF3D7_1300100	erythrocyte membrane protein 1, PfEMP1	(3-5)	1	MG<span class=\motif\">PPG</span>ITGTQGETAKHMFDRIGKQV..."	1	-2.096	Mutable in CDS		no ortholog	null	null	null	null	null	3
OG5_128193	PF3D7_1300300	erythrocyte membrane protein 1, PfEMP1	(2238-2240), (2256-2258), (2732-2734), (2913-2915), (2916-2918)	5	... QKQIETCQTKHKETSGNTCS<span class=\motif\">PPP</span>NPDTQTDTPLPLESF<span class=\"motif\">PPP</span>FCNVPPNPCGDKDATNVVGV... AFKKPPKKYERACKCHEKQE<span class=\"motif\">PPP</span>PKVPEDSEDDRERSEPGEDA... DHGGQEAEAVPPQPQAPAPL<span class=\"motif\">PPP</span><span class=\"motif\">PPP</span>LPPLKTALMSSTIMWSVGIG..."	1	-1.824	Mutable in CDS		no ortholog	null	null	null	null	null	3
OG5_152793	PF3D7_1360900	RNA-binding protein, putative	(306-308), (309-311)	2	... EQYLAPQYLNIDRMNNSYNS<span class=\motif\">PPP</span><span class=\"motif\">PPP</span>PMSCHGNESSNYANNEMYSI..."	null	null	null		no ortholog	null	null	null	null	null	3
OG5_128193	PF3D7_1373500	erythrocyte membrane protein 1, PfEMP1	(1735-1737)	1	... PTQPADGGEQTPVLKPEEEA<span class=\motif\">PPP</span>AQAPDVAPPARAPADQPFDP..."	null	null	null		no ortholog	null	null	null	null	null	3
OG5_pfal|PF14_0236	PF3D7_1425600	zinc finger protein, putative	(391-393)	1	... IFRMDTFYNNIFDSRNHMDK<span class=\motif\">PPP</span>HNINNNNSNNNNNNNIVSVE..."	1	-2.462	Mutable in CDS		no ortholog	null	null	null	null	null	3
OG5_130764	PF3D7_0305800	P-loop containing nucleoside triphosphate hydrolase, putative	null	0	null	1	0.524	Mutable in CDS		PBANKA_0404300	P-loop containing nucleoside triphosphate hydrolase, putative	(423-425)	1	... LTKEFCEYRNLKSLKIMIMG<span class=\motif\">PPG</span>VGKTFIGKKICEHYNLKICS..."	Dispensable	4
OG5_153555	PF3D7_0321600	ATP-dependent RNA helicase DDX42, putative	null	0	null	1	0.124	Mutable in CDS		PBANKA_1216900	ATP-dependent RNA helicase DDX42, putative	(698-700)	1	... IISLGSMPFQASSSQKQNEK<span class=\motif\">PPP</span>KQVHMISSNDVLSSSSDEY"	Dispensable	4
OG5_163742	PF3D7_0322200	conserved Plasmodium protein, unknown function	null	0	null	0.693	-0.397	Mutable in CDS		PBANKA_1216300	conserved Plasmodium protein, unknown function	(667-669)	1	... DLKNELYDCKNKLHQVNKPI<span class=\motif\">PPP</span>IQTIMFNANPEYGLSQEKEN..."	Dispensable	4
OG5_165920	PF3D7_0516800	AP2 domain transcription factor AP2-O2, putative	null	0	null	1	-1.215	Mutable in CDS		PBANKA_1231600	AP2 domain transcription factor AP2-O2	(722-724)	1	... TNHVNTEEPTASIYNDRTSC<span class=\motif\">PPP</span>NIPNESYSKRPQRNAAKKCI..."	Dispensable	4
OG5_156882	PF3D7_0624200	conserved Plasmodium protein, unknown function	null	0	null	0.72	-0.314	Mutable in CDS		PBANKA_1123100	conserved Plasmodium protein, unknown function	(10-12)	1	MNGDYFNNE<span class=\motif\">PPP</span>GILNDLNNNETSLSYYNLNE..."	Dispensable	4
OG5_167114	PF3D7_0816900	adenylate kinase 2	null	0	null	0.141	-3.054	Non - Mutable in CDS		PBANKA_0713900	adenylate kinase 2, putative	(3-5), (16-18)	2	MV<span class=\motif\">PPP</span>PKKKVYIMNG<span class=\"motif\">PPG</span>SGKDTHCVALSKKYNFEIIT..."	Dispensable	4
OG5_126960	PF3D7_0915000	type II NADH:ubiquinone oxidoreductase	null	0	null	0.479	-1.983	Mutable in CDS		PBANKA_0816000	type II NADH:ubiquinone oxidoreductase	(446-448)	1	... EMTPKELEKYLIMIDKNYKS<span class=\motif\">PPP</span>TAQNAKQEAFYLSNIFNNYL..."	Dispensable	4
OG5_130312	PF3D7_0923700	conserved protein, unknown function	null	0	null	0.281	-2.656	Non - Mutable in CDS		PBANKA_0824600	conserved protein, unknown function	(90-92)	1	... DSYNSNEVTCPDANNFRTGI<span class=\motif\">PPP</span>KDAAIKLINLVDKMKRQLVE..."	Dispensable	4
OG5_169830	PF3D7_0928100	conserved Plasmodium protein, unknown function	null	0	null	1	-0.035	Mutable in CDS		PBANKA_0828900	conserved Plasmodium protein, unknown function	(308-310)	1	... KLPSYILKKKKDIPDESMDA<span class=\motif\">PPG</span>YRVLKNDERNYVLKELHSQL..."	Dispensable	4
OG5_167190	PF3D7_1129300	conserved Plasmodium protein, unknown function	null	0	null	1	-0.027	Mutable in CDS		PBANKA_0918900	conserved Plasmodium protein, unknown function	(871-873)	1	... MKSMDSLNMVYKMLRYATEI<span class=\motif\">PPG</span>EYEKYIRKLKKKKIQINCNT..."	Dispensable	4
OG5_144120	PF3D7_1221400	inner membrane complex protein 1h, putative	null	0	null	1	-1.951	Mutable in CDS		PBANKA_1436600	inner membrane complex protein 1h	(495-497)	1	... NGTSQSLFPPLAHNDRVPFL<span class=\motif\">PPP</span>AVPGTPDVKAIQKNI"	Dispensable	4
OG5_130217	PF3D7_1226800	ataxin-3, putative	null	0	null	0.121	-2.924	Non - Mutable in CDS		PBANKA_1441600	ataxin-3, putative	(274-276)	1	... GDDDFKTALRLSMEEYIKNL<span class=\motif\">PPP</span>KSEELINEDFINVMIKLPNK..."	Dispensable	4
OG5_158065	PF3D7_1314800	ubiquitin-like protein, putative	null	0	null	0.124	-3.047	Non - Mutable in CDS		PBANKA_1413300	ubiquitin-like protein, putative	(87-89)	1	... KKTFSYYKIKPNDTIYVLPE<span class=\motif\">PPP</span>SPFLIYLFHQISGKMHCIEL..."	Dispensable	4
OG5_127348	PF3D7_1344600	lipoyl synthase	null	0	null	0.135	-2.807	Non - Mutable in CDS		PBANKA_1357500	lipoyl synthase	(233-235)	1	... LLGDTCTRGCKFCSIKTSSK<span class=\motif\">PPP</span>PDINEPFNTAKAICEWDINY..."	Dispensable	4
OG5_141742	PF3D7_1455800	LCCL domain-containing protein	null	0	null	0.979	-2.053	Mutable in CDS		PBANKA_1319500	LCCL domain-containing protein	(721-723)	1	... DSFNSEMSGFVCSDNINSIN<span class=\motif\">PPP</span>PFINLNCDTTLKQAIEIEKF..."	Dispensable	4
OG5_157148	PF3D7_0212500	conserved Plasmodium protein, unknown function	null	0	null	0.12	-3.048	Non - Mutable in CDS		PBANKA_0309400	conserved Plasmodium protein, unknown function	(1361-1363)	1	... GVKTKGRDMFDKSNNFGFSQ<span class=\motif\">PPP</span>FKFMGDNIMNSQEINYKNSE..."	Essential	4
OG5_127024	PF3D7_0309200	serine/threonine protein kinase, putative	null	0	null	0.199	-2.77	Non - Mutable in CDS		PBANKA_0407400	serine/threonine protein kinase, putative	(1225-1227)	1	... KEMEKYKYLMKKNKIKSNSI<span class=\motif\">PPG</span>NQKEIEKNANKYECRNNYRS..."	Essential	4
OG5_127916	PF3D7_0320900	histone H2A.Z	null	0	null	0.16	-3.448	Non - Mutable in CDS		PBANKA_1217600	histone H2A.Z, putative	(148-150)	1	... IAGGGVIPHIHKALMNKVPV<span class=\motif\">PPP</span>QTKKPKKN"	Essential	4
OG5_147480	PF3D7_0406800	ribosomal protein L25, putative	null	0	null	0.205	-2.7	Non - Mutable in CDS		PBANKA_1004400	ribosomal protein L25, putative	(196-198)	1	... GYHVQLALNYIKCNVLGNNI<span class=\motif\">PPP</span>FQIDVSKLSYKEPYNSIKLR..."	Essential	4
OG5_129688	PF3D7_0527900	ATP-dependent RNA helicase DDX41, putative	null	0	null	0.451	-2.737	Non - Mutable in CDS		PBANKA_1242500	ATP-dependent RNA helicase DDX41, putative	(179-181)	1	... KEYVDKIRKVFYIDISGNDV<span class=\motif\">PPP</span>IKNFKDMKFPKAILKGLKKK..."	Essential	4
OG5_127081	PF3D7_0528100	AP-1 complex subunit beta, putative	null	0	null	0.12	-2.959	Non - Mutable in CDS		PBANKA_1242700	AP-1 complex subunit beta, putative	(693-695)	1	... ELNEDGNTNNNIDDSKQKKT<span class=\motif\">PPP</span>VKLTQVLSPEDAGVKGQRGL..."	Essential	4
OG5_126830	PF3D7_0528400	palmitoyltransferase DHHC7	null	0	null	0.394	-2.585	Non - Mutable in CDS		PBANKA_1243000	palmitoyltransferase DHHC7	(171-173)	1	... SIFHFFLLMFLINYILSIVT<span class=\motif\">PPG</span>FIPNTEEWVFKDFGENNSNN..."	Essential	4
OG5_153566	PF3D7_0722700	conserved Plasmodium protein, unknown function	null	0	null	0.163	0	Non - Mutable in CDS		PBANKA_0620200	conserved Plasmodium protein, unknown function	(75-77)	1	... KKMLSFGIWKKTDVGYNKTA<span class=\motif\">PPP</span>YE"	Essential	4
OG5_128060	PF3D7_0727000	vacuolar protein sorting-associated protein 53, putative	null	0	null	0.882	-2.948	Mutable in CDS		PBANKA_0211100	vacuolar protein sorting-associated protein 53, putative	(371-373)	1	... QTVIKIINFEKFLIKNIFFI<span class=\motif\">PPP</span>GHLSLDNFNFIELPFPEMIQ..."	Essential	4
OG5_127251	PF3D7_0804900	GTPase-activating protein, putative	null	0	null	0.989	-2.411	Mutable in CDS		PBANKA_1225700	GTPase-activating protein, putative	(220-222)	1	... QFGNAFSNVNDLNKFNRSSI<span class=\motif\">PPP</span>NNFFEEKMIYNNSNKNFKAK..."	Essential	4
OG5_154802	PF3D7_0809600	peptidase family C50, putative	null	0	null	0.134	-2.931	Non - Mutable in CDS		PBANKA_1427800	peptidase family C50, putative	(4353-4355)	1	... YHNKKKGGEHILMQNLKNYL<span class=\motif\">PPG</span>EYDPIKSEFIQNMIEQSDIF..."	Essential	4
OG5_127146	PF3D7_0811300	CCR4-associated factor 1	null	0	null	1	-1.904	Mutable in CDS		PBANKA_1426200	CCR4-associated factor 1, putative	(1039-1041), (1042-1044), (1045-1047), (1048-1050)	4	... KDDKSSSLNKTAIANMNLKH<span class=\motif\">PPP</span><span class=\"motif\">PPP</span><span class=\"motif\">PPP</span><span class=\"motif\">PPP</span>INNNMPNMLNNNNSINSING..."	Essential	4
OG5_126774	PF3D7_0909400	exoribonuclease, putative	null	0	null	0.137	-2.944	Non - Mutable in CDS		PBANKA_0810600	exoribonuclease, putative	(1219-1221)	1	... YNNSYNPNYNNNYGKNRNDK<span class=\motif\">PPP</span>SNLYNSGGKYHGDYKNNNYN..."	Essential	4
OG5_128421	PF3D7_0927900	phosphatidylserine decarboxylase	null	0	null	0.127	-2.96	Non - Mutable in CDS		PBANKA_0828700	phosphatidylserine decarboxylase, putative	(342-344)	1	... NVKENQTVSVGQRIGGITWH<span class=\motif\">PPP</span>KNKVIKIKS"	Essential	4
OG5_162009	PF3D7_1003100	conserved Plasmodium protein, unknown function	null	0	null	0.936	0	Non - Mutable in CDS		PBANKA_1201500	conserved Plasmodium protein, unknown function	(21-23)	1	MLFKNSHIRYISHEMKSIPK<span class=\motif\">PPP</span>GTGVVFHGRLQKVKYAINFP..."	Essential	4
OG5_147469	PF3D7_1021000	conserved Plasmodium protein, unknown function	null	0	null	0.12	-2.994	Non - Mutable in CDS		PBANKA_0505200	conserved Plasmodium protein, unknown function	(228-230)	1	... NIHTQIKIFYARGRTLQYRL<span class=\motif\">PPP</span>FWTKCKILKENKILQEKYGG..."	Essential	4
OG5_153600	PF3D7_1038100	GDP dissociation inhibitor, putative	null	0	null	0.12	-3.024	Non - Mutable in CDS		PBANKA_0521000	GDP dissociation inhibitor, putative	(568-570)	1	... SHNLNTNVHILQLDYSSGSC<span class=\motif\">PPG</span>FFLTYFTYLEIIEEQKITNN..."	Essential	4
OG5_127663	PF3D7_1106100	apicoplast ribosomal protein S15 precursor, putative	null	0	null	0.169	0	Non - Mutable in CDS		PBANKA_0940800	apicoplast ribosomal protein S15 precursor, putative	(80-82)	1	... GKYIYHGKRSEILKANENAS<span class=\motif\">PPP</span>VKDNTTSINMIGKKEKQKSE..."	Essential	4
OG5_130982	PF3D7_1119500	AP-4 complex subunit mu, putative	null	0	null	0.175	-2.88	Non - Mutable in CDS		PBANKA_0928600	AP-4 complex subunit mu, putative	(44-46)	1	... DVLKGSAEIFFRKVKLHKGD<span class=\motif\">PPP</span>LFYLNGINFCFLKNNNLYYV..."	Essential	4
OG5_144096	PF3D7_1121100	conserved Plasmodium protein, unknown function	null	0	null	0.69	-2.246	Mutable in CDS		PBANKA_0927200	conserved Plasmodium protein, unknown function	(57-59)	1	... LKRWVVKGEEDKIETEEKIA<span class=\motif\">PPP</span>QMSALQNASSGYRSLIQQNK..."	Essential	4
OG5_156041	PF3D7_1125800	kelch domain-containing protein, putative	null	0	null	1	-1.254	Mutable in CDS		PBANKA_0922500	kelch domain-containing protein, putative	(245-247)	1	... ETYKFDFQARKWEHVQNEYK<span class=\motif\">PPP</span>RYKHASFSFDDVLYIHGGLD..."	Essential	4
OG5_128684	PF3D7_1217300	GTP-binding protein, putative	null	0	null	0.36	-2.591	Non - Mutable in CDS		PBANKA_1432900	GTP-binding protein, putative	(769-771)	1	... PVPIKGKTLNIYYAIQAHVK<span class=\motif\">PPG</span>FVFFCNSEKSTYLNYTKYLE..."	Essential	4
OG5_128702	PF3D7_1248200	pre-mRNA-splicing factor RBM22, putative	null	0	null	0.698	-2.367	Non - Mutable in CDS		PBANKA_1461100	pre-mRNA-splicing factor RBM22, putative	(337-339)	1	... FNNNNNNKFTKNNNNFRFHN<span class=\motif\">PPP</span>SHSQGNTMNNMMPPIYFPYN..."	Essential	4
OG5_128042	PF3D7_1302700	ATP-dependent RNA helicase DHR1, putative	null	0	null	0.155	-2.867	Non - Mutable in CDS		PBANKA_1401200	ATP-dependent RNA helicase DHR1, putative	(606-608), (1405-1407)	2	... TPKNYVEEAKKKIIQIHKKL<span class=\motif\">PPG</span>SILVFLTSQEEIYQLYNALN... DSDLGKIRNVCIYINGYEKI<span class=\"motif\">PPP</span>TYDMEKDKIIVCARPIYLLA..."	Essential	4
OG5_127059	PF3D7_1306900	U1 small nuclear ribonucleoprotein A, putative	null	0	null	0.192	-2.789	Non - Mutable in CDS		PBANKA_1405400	U1 small nuclear ribonucleoprotein A, putative	(70-72)	1	... QINNNGRLNNAGSRKWSYDI<span class=\motif\">PPP</span>PDSKKYPSENNSNDDSNKNN..."	Essential	4
OG5_131654	PF3D7_1318100	ferredoxin, putative	null	0	null	0.659	-2.447	Non - Mutable in CDS		PBANKA_1416600	ferredoxin, putative	(26-28)	1	MRVALFFLYYIFFFKQNNTYKLNNN<span class=\motif\">PPP</span>LNYMYGNKLIINIPRNRVCV..."	Essential	4
OG5_153572	PF3D7_1323600	conserved Plasmodium protein, unknown function	null	0	null	0.187	-2.568	Non - Mutable in CDS		PBANKA_1338800	conserved Plasmodium protein, unknown function	(431-433)	1	... PKEKLQEILEQVQNIKNQNI<span class=\motif\">PPP</span>NLPKP"	Essential	4
OG5_139591	PF3D7_1332200	conserved Plasmodium protein, unknown function	null	0	null	0.996	-0.983	Mutable in CDS		PBANKA_1347000	conserved Plasmodium protein, unknown function	(908-910), (911-913)	2	... IPLSVKLGDATPILKKTIVK<span class=\motif\">PPP</span><span class=\"motif\">PPP</span>LNESKSSNEDPDLKTILEKA..."	Essential	4
OG5_158126	PF3D7_1360400	conserved Plasmodium protein, unknown function	null	0	null	0.154	-3.161	Non - Mutable in CDS		PBANKA_1136600	conserved Plasmodium protein, unknown function	(212-214)	1	... NGIGNNYININNEVIRNLIE<span class=\motif\">PPP</span>IQFNKTFQKYNKEISEMFIK..."	Essential	4
OG5_128070	PF3D7_1367100	U1 small nuclear ribonucleoprotein 70 kDa homolog, putative	null	0	null	0.336	-2.543	Non - Mutable in CDS		PBANKA_1143000	U1 small nuclear ribonucleoprotein 70 kDa homolog, putative	(49-51)	1	... KKPKEYSGISEFLNYFEDGK<span class=\motif\">PPP</span>KIKLESPKERKERKKKEKIA..."	Essential	4
OG5_156196	PF3D7_1408700	conserved protein, unknown function	null	0	null	0.999	-2.985	Mutable in CDS		PBANKA_1033800	conserved protein, unknown function	(735-737)	1	... IKHCYLLAFSFISHILINIL<span class=\motif\">PPP</span>KQFIFLSKWENLKRPLQISL..."	Essential	4
OG5_153136	PF3D7_1445600	RNA-binding protein, putative	null	0	null	0.962	0.487	Mutable in CDS		PBANKA_1309400	RNA-binding protein, putative	(477-479)	1	... ERNIPRKINPSHDDAPIINT<span class=\motif\">PPP</span>TNNNNNSNNNNNFPNNFPNN..."	Essential	4
OG5_126816	PF3D7_1465300	tRNA 3'-trailer sequence RNase, putative	null	0	null	0.231	-3.33	Non - Mutable in CDS		PBANKA_1328700	tRNA 3'-trailer sequence RNase, putative	(292-294)	1	... IECPQTIGKFHVEKAQKLNI<span class=\motif\">PPG</span>KYYGMLKSGKIVTINNKIIN..."	Essential	4
OG5_159725	PF3D7_0304600	circumsporozoite (CS) protein	null	0	null	0.962	-2.132	Non - Mutable in CDS		PBANKA_0403200	circumsporozoite (CS) protein	(93-95), (102-104), (110-112), (118-120), (126-128), (134-136), (174-176), (190-192)	8	... EGKKNEKKNEKIERNNKLKQ<span class=\motif\">PPP</span>PPNPND<span class=\"motif\">PPP</span>PNPND<span class=\"motif\">PPP</span>PNPND<span class=\"motif\">PPP</span>PNPND<span class=\"motif\">PPP</span>PNAND<span class=\"motif\">PPP</span>PNANDPAPPNANDPAPPNANDPAPPNANDPAPPNAND<span class=\"motif\">PPP</span>PNPNDPAPPNAND<span class=\"motif\">PPP</span>PNPNDPAPPQGNNNPQPQPR..."	no data	4
OG5_127167	PF3D7_0708800	heat shock protein 110	null	0	null	0.14	-2.848	Non - Mutable in CDS		PBANKA_1219300	heat shock protein 110, putative	(602-604)	1	... KGEEGKIQTCYTTIPLEIIS<span class=\motif\">PPG</span>TYTNKEIYNFSEAEINMQHS..."	no data	4
OG5_167344	PF3D7_0711300	conserved Plasmodium protein, unknown function	null	0	null	0.13	-2.592	Non - Mutable in CDS		PBANKA_1221900	conserved Plasmodium protein, unknown function	(30-32)	1	MSSNNFNEKKRYFNMYGHITNSINLNSQV<span class=\motif\">PPP</span>PLNLHDHSPYIPQHPFDKKP..."	no data	4
OG5_162012	PF3D7_0722900	conserved Plasmodium protein, unknown function	null	0	null	0.666	-2.366	Non - Mutable in CDS		PBANKA_0620400	conserved Plasmodium protein, unknown function	(161-163)	1	... AYSLNSNPCKWGVDVFRYDL<span class=\motif\">PPP</span>KKLYRHVNNLSTCLVPHKSD..."	no data	4
OG5_130956	PF3D7_0730200	AP-4 complex subunit beta, putative	null	0	null	0.134	-3.071	Non - Mutable in CDS		PBANKA_0214300	AP-4 complex subunit beta, putative	(742-744)	1	... NDNNNTFNSQYKNRNSDKIR<span class=\motif\">PPP</span>NNDTISEEKRTSLELLDMID..."	no data	4
OG5_144682	PF3D7_0812700	U1 small nuclear ribonucleoprotein C, putative	null	0	null	1	-2.658	Mutable in CDS		PBANKA_1424800	U1 small nuclear ribonucleoprotein C, putative	(117-119)	1	... SNYQHSIGMHNNKYSRAGYV<span class=\motif\">PPG</span>SNKYPNNHFHNNKRINNIPK..."	no data	4
OG5_126588	PF3D7_0917900	heat shock protein 70	null	0	null	0.173	-2.68	Non - Mutable in CDS		PBANKA_0818900	heat shock protein 70, putative	(639-641)	1	... VEAICQPIIVKLYGQPGANT<span class=\motif\">PPP</span>GDEDVDSDEL"	no data	4
OG5_166816	PF3D7_1002800	DnaJ protein, putative	null	0	null	1	-2.177	Mutable in CDS		PBANKA_1201200	DnaJ protein, putative	(900-902)	1	... KDVDFFYKWFDFFFKNDIDK<span class=\motif\">PPP</span>NDQNIQEIQKENELSKMKET..."	no data	4
OG5_167323	PF3D7_1007700	AP2 domain transcription factor AP2-I	null	0	null	0.474	-2.524	Non - Mutable in CDS		PBANKA_1205900	AP2 domain transcription factor AP2-I, putative	(1044-1046)	1	... IGAFKNYTTPGVGNNGMVVV<span class=\motif\">PPG</span>MNNLAELNAINGLDPNGVIN..."	no data	4
OG5_167045	PF3D7_1024500	conserved Plasmodium protein, unknown function	null	0	null	0.131	-2.769	Non - Mutable in CDS		PBANKA_0508700	conserved Plasmodium protein, unknown function	(107-109)	1	... FMFSVFSYCVVNLVWMFFEQ<span class=\motif\">PPP</span>LIIVKENVLKDKKLIDEYEE..."	no data	4
OG5_128127	PF3D7_1103800	CCR4-NOT transcription complex subunit 1, putative	null	0	null	1	-0.505	Mutable in CDS		PBANKA_0943100	CCR4-NOT transcription complex subunit 1, putative	(913-915)	1	... EYNANKNNPLQNDQILVSSF<span class=\motif\">PPP</span>DIKSNNSTTFNKVFDSISKA..."	no data	4
OG5_127975	PF3D7_1125300	DNA-directed RNA polymerase	null	0	null	0.147	-2.841	Non - Mutable in CDS		PBANKA_0923000	DNA-directed RNA polymerase, putative	(1389-1391)	1	... ILENIYQNFQMRLGKYAEKI<span class=\motif\">PPP</span>PEQGYLDISLVRDSKYFFS"	no data	4
OG5_164987	PF3D7_1145800	conserved Plasmodium protein, unknown function	null	0	null	0.203	-2.592	Non - Mutable in CDS		PBANKA_0903200	conserved Plasmodium protein, unknown function	(887-889)	1	... NSENPININSNLYEPFTTSS<span class=\motif\">PPP</span>TNHPNNNSINRNINKKKKII..."	no data	4
OG5_145113	PF3D7_1208200	cysteine repeat modular protein 3	null	0	null	1	-1.061	Mutable in CDS		PBANKA_0606700	cysteine repeat modular protein 3	(3045-3047)	1	... LLYYNTTYSNNEIFTNLNNS<span class=\motif\">PPP</span>KYCYSSSGSKMSKDESLSNR..."	no data	4
OG5_165474	PF3D7_1208800	zinc finger protein, putative	null	0	null	1	-2.489	Mutable in CDS		PBANKA_0607300	zinc finger protein, putative	(91-93)	1	... NDENNNLNTDFVCDNTEKNM<span class=\motif\">PPP</span>FSSNVKPEKNNKSTLTNANN..."	no data	4
OG5_166424	PF3D7_1227600	conserved Plasmodium protein, unknown function	null	0	null	0.246	-2.617	Non - Mutable in CDS		PBANKA_1442300	conserved Plasmodium protein, unknown function	(70-72)	1	... KNTLIRNTNFKLRTNNNTFK<span class=\motif\">PPP</span>RGIIKSSQNALHKNAQIDSN..."	no data	4
OG5_147418	PF3D7_1233800	conserved Plasmodium protein, unknown function	null	0	null	0.124	-3.151	Non - Mutable in CDS		PBANKA_1448400	conserved Plasmodium protein, unknown function	(16-18)	1	MPKKLNILKAKLPKA<span class=\motif\">PPG</span>RRPIGYRGNHKHGKALYDPV..."	no data	4
OG5_155011	PF3D7_1238600	sphingomyelin phosphodiesterase	null	0	null	1	-1.894	Mutable in CDS		PBANKA_1453100	sphingomyelin phosphodiesterase, putative	(261-263)	1	... IMKKKKKKKKQRKKEKRKED<span class=\motif\">PPP</span>FDSISGEPKFRHFLNGGIIV..."	no data	4
OG5_165928	PF3D7_1245200	conserved Plasmodium membrane protein, unknown function	null	0	null	0.146	-3.227	Non - Mutable in CDS		PBANKA_1458400	conserved Plasmodium protein, unknown function	(706-708)	1	... PNLRQQHIIEIPNKKIGPNY<span class=\motif\">PPP</span>YNINNVEKNIKYIVNILNSN..."	no data	4
OG5_150527	PF3D7_1309000	conserved Plasmodium protein, unknown function	null	0	null	0.131	-2.813	Non - Mutable in CDS		PBANKA_1407500	conserved Plasmodium protein, unknown function	(315-317)	1	... LMILLKNKLMPILEEELKKK<span class=\motif\">PPP</span>TNFEKIVDYYVKKLHVEYLN..."	no data	4
OG5_165511	PF3D7_1335000	MSP7-like protein	null	0	null	1	-1.197	Mutable in CDS		PBANKA_1349000	MSP7-like protein	(314-316)	1	... SKMFQTSSFQTPPIQTPPSS<span class=\motif\">PPP</span>APASPPEASAPAASVPAASV..."	no data	4
OG5_156109	PF3D7_1339700	conserved Plasmodium protein, unknown function	null	0	null	0.687	-2.383	Non - Mutable in CDS		PBANKA_1353100	conserved Plasmodium protein, unknown function	(687-689)	1	... GSNIAIDQIDYNNDILHIEY<span class=\motif\">PPP</span>VILKKQINEKLEHSLMQNNK..."	no data	4
OG5_126972	PF3D7_1350100	lysine--tRNA ligase	null	0	null	0.329	-2.517	Non - Mutable in CDS		PBANKA_1362900	lysine--tRNA ligase, putative	(60-62)	1	... HFTTMTEKREHVTSNQKKTN<span class=\motif\">PPP</span>VDASKEDETELDPRLYYENR..."	no data	4
OG5_127447	PF3D7_1410600	eukaryotic translation initiation factor 2 subunit gamma, putative	null	0	null	0.125	-2.97	Non - Mutable in CDS		PBANKA_1031900	eukaryotic translation initiation factor 2 subunit gamma, putative	(91-93)	1	... ITIKLGYANAKIYKCTNPDC<span class=\motif\">PPP</span>ECYKSYESSKEDDPICPREN..."	no data	4
OG5_166796	PF3D7_1416600	conserved Plasmodium protein, unknown function	null	0	null	1	-1.037	Mutable in CDS		PBANKA_1026100	conserved Plasmodium protein, unknown function	(2688-2690)	1	... KISPFFGNKNSVDFSNDNNL<span class=\motif\">PPP</span>KNNSIEPFKLNIQFNDYVWE..."	no data	4
OG5_126585	PF3D7_1442600	TRAP-like protein	null	0	null	1	0.542	Mutable in CDS		PBANKA_1306500	TRAP-like protein	(31-33), (423-425)	2	MKFFFILAIFSLFSFSFGAKLKKPFLGLEL<span class=\motif\">PPP</span>FIFDFCKGMNIHFLISAEEV... FIDNRVKVMLNKQYALLNIN<span class=\"motif\">PPG</span>YEEETKGNSEDLTDTRKISE..."	no data	4
OG5_142870	PF3D7_1452000	rhoptry neck protein 2	null	0	null	0.229	-2.619	Non - Mutable in CDS		PBANKA_1315700	rhoptry neck protein 2	(1935-1937)	1	... TQHATDIGMGPSTSCYTSLV<span class=\motif\">PPP</span>KSICIQQTVKAVLTNSTLAS..."	no data	4
OG5_141743	PF3D7_0407700	conserved Plasmodium protein, unknown function	null	0	null	1	-1.61	Mutable in CDS		PBANKA_1005300	conserved Plasmodium protein, unknown function	(509-511)	1	... YETNKLQKYMDEYRDTHSWK<span class=\motif\">PPP</span>FYWKILKNKYVAKEVLKLYE..."	Slow	4
OG5_130592	PF3D7_0413500	phosphoglucomutase-2	null	0	null	0.119	-3.017	Non - Mutable in CDS		PBANKA_0715500	phosphoglucomutase-2	(226-228)	1	... EKIKVDNQRINKAYETYFYQ<span class=\motif\">PPG</span>DEDEYQLVICHGNVIRYFLC..."	Slow	4
OG5_156203	PF3D7_0619300	conserved Plasmodium protein, unknown function	null	0	null	1	-0.913	Mutable in CDS		PBANKA_1118500	conserved Plasmodium protein, unknown function	(332-334)	1	... FPLTTHNSINQKILDNLKKI<span class=\motif\">PPP</span>NIHTLNRKVKVCSKTINDSK..."	Slow	4
OG5_127624	PF3D7_0818500	zinc finger protein, putative	null	0	null	0.999	-2.618	Non - Mutable in CDS		PBANKA_0712300	zinc finger protein, putative	(9-11)	1	MSSEKNAT<span class=\motif\">PPP</span>SILCENNCGFYGNRANNNLC..."	Slow	4
OG5_127427	PF3D7_1137300	CLPTM1 domain-containing protein, putative	null	0	null	1	-2.335	Mutable in CDS		PBANKA_0911400	CLPTM1 domain-containing protein, putative	(11-13)	1	MEENVATTPA<span class=\motif\">PPG</span>QGQTANGNENQRVSFFQKII..."	Slow	4
OG5_156257	PF3D7_1328200	conserved Plasmodium protein, unknown function	null	0	null	1	-1.256	Mutable in CDS		PBANKA_1343400	conserved Plasmodium protein, unknown function	(1657-1659)	1	... IIPYNSLNLDITLINCIDQV<span class=\motif\">PPP</span>SPIEFIYKLLKRYIEEQKNK..."	Slow	4
OG5_167254	PF3D7_1408200	AP2 domain transcription factor AP2-G2, putative	null	0	null	1	-0.866	Mutable in CDS		PBANKA_1034300	AP2 domain transcription factor AP2-G2	(1362-1364)	1	... EYTKEFLNEDKKKITSNNVN<span class=\motif\">PPG</span>KKSKKKRKIKNFYDC"	Slow	4
OG5_164280	PF3D7_1428100	WW domain-binding protein 11, putative	null	0	null	1	-2.311	Mutable in CDS		PBANKA_1016500	WW domain-binding protein 11, putative	(427-429)	1	... NNYYYNYSFNYNNVNNNIPS<span class=\motif\">PPG</span>YNNIQNSFINNNNNINSGFK..."	Slow	4
OG5_127125	PF3D7_1442300	tRNA import protein tRIP	null	0	null	1	0.417	Mutable in CDS		PBANKA_1306200	tRNA import protein tRIP, putative	(331-333)	1	... RKSFGMILCGSFEERVELLT<span class=\motif\">PPP</span>GVKIGERITFENMNTNSLPD..."	Slow	4
OG5_147419	PF3D7_1466400	AP2 domain transcription factor AP2-EXP	null	0	null	0.995	-2.272	Mutable in CDS		PBANKA_1329800	AP2 domain transcription factor AP2-SP	(140-142)	1	... GENSENGENSEMATEQKEVA<span class=\motif\">PPP</span>QVLSIKKKVGRPKGATSANK..."	Slow	4
OG5_131690	no ortholog	null	null	null	null	null	null	null		PBANKA_0400500	PIR protein	(314-316)	1	... YDKQNNQIIFNKPIKGKDVT<span class=\motif\">PPG</span>KINDKSANDSSSLCDTTLDD..."	Dispensable	5
OG5_142171	no ortholog	null	null	null	null	null	null	null		PBANKA_1400051	PIR protein	(351-353)	1	... RYKRHEPHGTGDKSPTSNDS<span class=\motif\">PPP</span>QETPSEASSPSSSTEQTKTP..."	Dispensable	5
OG5_147059	no ortholog	null	null	null	null	null	null	null		PBANKA_0316800	erythrocyte membrane associated protein 2	(314-316)	1	... RTGIPPEHIQIIEMPFRSPT<span class=\motif\">PPP</span>PPVKVTYKTSVIPKLKLKKP..."	Dispensable	5
OG5_184627	no ortholog	null	null	null	null	null	null	null		PBANKA_0519300	conserved Plasmodium protein, unknown function	(228-230)	1	... DQAQPQEISQEMTRIKPQPE<span class=\motif\">PPP</span>NPELSPTPEPLPHPESQPQK..."	Essential	5
OG5_145090	no ortholog	null	null	null	null	null	null	null		PBANKA_0007701	PIR protein, pseudogene	(362-364)	1	... QNGISRPSPASFSKPSGVPS<span class=\motif\">PPP</span>PLPSYQPKDNEPETPPAPRV..."	no data	5
OG5_167067	no ortholog	null	null	null	null	null	null	null		PBANKA_0523800	asparagine rich protein, putative	(129-131), (132-134), (137-139)	1	... RYKRHEPHGTGDKSPTSNDS<span class=\motif\">PPP</span>QETPSEASSPSSSTEQTKTP..."	no data	5
OG5_155692	no ortholog	null	null	null	null	null	null	null		PBANKA_0623700	PIR protein	(463-465)	3	... DNNNEKPKQPETAQNLKEAL<span class=\motif\">PPP</span><span class=\"motif\">PPP</span>VV<span class=\"motif\">PPP</span>LPPMTPSSIAGHVVSNVFQA..."	no data	5
OG5_127056	no ortholog	null	null	null	null	null	null	null		PBANKA_0944081	PIR protein	(93-95)	1	... DSKPEPELEPQLKSQTESPL<span class=\motif\">PPP</span>PQAQQHQPSLSQPEQEQEQT..."	no data	5
OG5_142171	no ortholog	null	null	null	null	null	null	null		PBANKA_1040581	PIR protein	(351-353)	1	... SNIDIVEYIIIWLSYMLNLK<span class=\motif\">PPG</span>SKSNLKHFYDTNINNDKYTK..."	no data	5
OG5_205404	no ortholog	null	null	null	null	null	null	null		PBANKA_1145800	membrane associated histidine-rich protein 1a	(156-158)	1	... DQAQPQEISQEMTRIKPQPE<span class=\motif\">PPP</span>NPELSPTPEPLPHPESQPQK..."	no data	5
OG5_243262	no ortholog	null	null	null	null	null	null	null		PBANKA_1146200	Plasmodium exported protein, unknown function	(120-122), (138-140)	1	... NQIGYAAGFLGDVSHERVAR<span class=\motif\">PPG</span>CTCGGHKAHGTTRGTTTHRT..."	no data	5
OG5_131690	no ortholog	null	null	null	null	null	null	null		PBANKA_1146261	PIR protein	(298-300)	2	... VFEEIKVSTTPKLKMGRLGI<span class=\motif\">PPP</span>SERRQIIEMPFRSPT<span class=\"motif\">PPP</span>VNLDYETKVTQPHVFKRTSK..."	no data	5
OG5_142171	no ortholog	null	null	null	null	null	null	null		PBANKA_1146761	PIR protein	(328-330)	1	... RPSKPHTTIKKPVQKGISRS<span class=\motif\">PPP</span>SLPKLSGVSSPLPPLPSYQP..."	no data	5
OG5_155692	no ortholog	null	null	null	null	null	null	null		PBANKA_1200061	PIR protein	(463-465)	1	... EDSEEQAVVQEKTPEKPQPE<span class=\motif\">PPP</span>GPQQQTVLSSANSESSSQQD..."	no data	5
OG5_145090	no ortholog	null	null	null	null	null	null	null		PBANKA_1246921	PIR protein	(402-404)	1	... DSKPEPELEPQLKSQTESPL<span class=\motif\">PPP</span>PQAQQHQPSLSQPEQEQEQT..."	no data	5
OG5_145090	no ortholog	null	null	null	null	null	null	null		PBANKA_1300061	PIR protein	(402-404)	1	... RYKRHEPHGTGDKSPTSNDS<span class=\motif\">PPP</span>QETPSEASSPSSSTEQTKTP..."	no data	5
OG5_145090	no ortholog	null	null	null	null	null	null	null		PBANKA_1466201	PIR protein	(402-404)	1	... NLNNMSIKPEILSYNYIMQS<span class=\motif\">PPG</span>KKKQPRANKSIILNKIIKNN..."	no data	5
OG5_132467	no ortholog	null	null	null	null	null	null	null		PBANKA_0304900	serine repeat antigen 3	(198-200)	1	... EGAGLATQKEQTPSKRAKRS<span class=\motif\">PPP</span>QVNNITDMESYLMKNYDGVK..."	no data	5
OG5_142171	no ortholog	null	null	null	null	null	null	null		PBANKA_0600031	PIR protein	(357-359)	1	... VVQEQSGAEPEPQLKSQTES<span class=\motif\">PPP</span>PQAQQAQAQQAQAQQAQAQQ..."	no data	5
OG5_171530	no ortholog	null	null	null	null	null	null	null		PBANKA_0214800	heat shock protein, putative	(284-286)	1	... LEDNALIMFHMEGDQVSPST<span class=\motif\">PPG</span>NIIFKIFTKKHDTFIRRGNN..."	no data	5
